# Supplementary material for: Association of COVID-19 With Achieving Time-to-Surgery Benchmarks in Patients With Musculoskeletal Trauma
Source: PubMed Central journal article supplement (PMC8727030; doi:10.1001/jamahealthforum.2021.3460), 2021-10-29

## Supplemental Online Content

Gitajn IL, Werth PM, Sprague S, et al; for the PREP-IT Investigators. Association of COVID-19 with achieving time-to-surgery benchmarks in patients with musculoskeletal trauma. *JAMA Health Forum*. 2021;2(10):e213460. doi:10.1001/jamahealthforum.2021.3460

**eTable 1.** Patients Numbers by Site Stratified by Onset of COVID-19 for Both Open and Closed Fracture Cohorts

**eTable 2.** Evaluation of Race in Open Fracture Cohort

**eTable 3.** Evaluation of Race in Closed Fracture Cohort

**eFigure 1.** Random Effects of Hospital Sites for Open Fracture Cohort

**eFigure 2.** Random Effects of Hospital Sites for Closed Fracture Cohort

**eFigure 3.** Hip and Femur Fracture Interaction Plot

**eFigure 4.** Patient Enrollment Plot

This supplemental material has been provided by the authors to give readers additional information about their work.

| <b>eTable 1. Patients Numbers by Site Stratified by Onset of COVID-19 for Both Open and Closed Fracture Cohorts</b> |                  |              |                  |              |
|---------------------------------------------------------------------------------------------------------------------|------------------|--------------|------------------|--------------|
|                                                                                                                     | Open Fracture    |              | Closed Fracture  |              |
|                                                                                                                     | <b>Pre-COVID</b> | <b>COVID</b> | <b>Pre-COVID</b> | <b>COVID</b> |
| <b>Total n</b>                                                                                                      | 1126             | 609          | 1062             | 807          |
| <b>Site (%)</b>                                                                                                     |                  |              |                  |              |
| 1                                                                                                                   | 24 (2.1)         | 4 (0.7)      | -                | -            |
| 2                                                                                                                   | 15 (1.3)         | 8 (1.3)      | 57 (5.4)         | 22 (2.7)     |
| 3                                                                                                                   | 23 (2.0)         | 21 (3.4)     | 53 (5.0)         | 34 (4.2)     |
| 4                                                                                                                   | 23 (2.0)         | 16 (2.6)     | 63 (5.9)         | 31 (3.8)     |
| 5                                                                                                                   | 79 (7.0)         | 11 (1.8)     | 26 (2.4)         | 27 (3.3)     |
| 6                                                                                                                   | 91 (8.1)         | 44 (7.2)     | 17 (1.6)         | 29 (3.6)     |
| 7                                                                                                                   | 40 (3.6)         | 28 (4.6)     | 84 (7.9)         | 61 (7.6)     |
| 8                                                                                                                   | 101 (9.0)        | 46 (7.6)     | 33 (3.1)         | 42 (5.2)     |
| 9                                                                                                                   | 19 (1.7)         | 3 (0.5)      | 51 (4.8)         | 13 (1.6)     |
| 10                                                                                                                  | 40 (3.6)         | 25 (4.1)     | 67 (6.3)         | 29 (3.6)     |
| 11                                                                                                                  | -                | -            | 45 (4.2)         | 59 (7.3)     |
| 12                                                                                                                  | 8 (0.7)          | 19 (3.1)     | 36 (3.4)         | 35 (4.3)     |
| 13                                                                                                                  | 26 (2.3)         | 15 (2.5)     | 32 (3.0)         | 38 (4.7)     |
| 14                                                                                                                  | 148 (13.1)       | 111 (18.2)   | 85 (8.0)         | 85 (10.5)    |
| 15                                                                                                                  | 28 (2.5)         | 21 (3.4)     | 192 (18.1)       | 119 (14.7)   |
| 16                                                                                                                  | 64 (5.7)         | 16 (2.6)     | 1 (0.1)          | 35 (4.3)     |
| 17                                                                                                                  | 2 (0.2)          | 12 (2.0)     | 8 (0.8)          | 20 (2.5)     |
| 18                                                                                                                  | 18 (1.6)         | 14 (2.3)     | 93 (8.8)         | 62 (7.7)     |
| 19                                                                                                                  | 23 (2.0)         | 5 (0.8)      | -                | -            |
| 20                                                                                                                  | 98 (8.7)         | 20 (3.3)     | -                | -            |
| 21                                                                                                                  | 29 (2.6)         | 17 (2.8)     | 70 (6.6)         | 34 (4.2)     |
| 22                                                                                                                  | 71 (6.3)         | 79 (13.0)    | -                | -            |
| 23                                                                                                                  | 89 (7.9)         | 47 (7.7)     | 49 (4.6)         | 32 (4.0)     |
| 24                                                                                                                  | 23 (2.0)         | 26 (4.3)     | -                | -            |
| 25                                                                                                                  | 44 (3.9)         | 1 (0.2)      | -                | -            |
|                                                                                                                     |                  |              |                  |              |

| <b>eTable 2. Evaluation of Race in Open Fracture Cohort</b>                                                                                                                                                          |                                                      |             |                  |
|----------------------------------------------------------------------------------------------------------------------------------------------------------------------------------------------------------------------|------------------------------------------------------|-------------|------------------|
| <i>Univariate Binary Logistic Regression Model</i>                                                                                                                                                                   |                                                      |             |                  |
|                                                                                                                                                                                                                      | <b>DV<sup>1</sup>: Surgery within 24 hours [Y/N]</b> |             |                  |
| <i>Variable</i>                                                                                                                                                                                                      | <i>Odds Ratios</i>                                   | <i>CI</i>   | <i>p</i>         |
| (Intercept)                                                                                                                                                                                                          | 0.04                                                 | 0.02 – 0.07 | <b>&lt;0.001</b> |
| Race <sup>2</sup> [Other <sup>3</sup> ]                                                                                                                                                                              | 0.36                                                 | 0.10 – 1.02 | 0.075            |
| Race [White]                                                                                                                                                                                                         | 0.78                                                 | 0.42 – 1.51 | 0.436            |
| Observations                                                                                                                                                                                                         | 1725                                                 |             |                  |
| R <sup>2</sup> Tjur                                                                                                                                                                                                  | 0.002                                                |             |                  |
| <i>Note:</i> <sup>1</sup> Referent: Yes. <sup>2</sup> Referent: Black/African American.<br><sup>3</sup> Other categories: Asian, American Indian or Alaska Native, Native Hawaiian or Other Pacific Islander, Other. |                                                      |             |                  |

| <b>eTable 3. Evaluation of Race in Closed Fracture Cohort</b> |                    |             |                  |
|---------------------------------------------------------------|--------------------|-------------|------------------|
| <i>Univariate Binary Logistic Regression Model</i>            |                    |             |                  |
| <b>DV<sup>1</sup>: Surgery within 24 hours [Y/N]</b>          |                    |             |                  |
| <i>Predictors</i>                                             | <i>Odds Ratios</i> | <i>CI</i>   | <i>p</i>         |
| (Intercept)                                                   | 0.25               | 0.18 – 0.33 | <b>&lt;0.001</b> |
| Race: <i>Other</i>                                            | 2.93               | 2.04 – 4.27 | <b>&lt;0.001</b> |
| Race: <i>White</i>                                            | 0.77               | 0.55 – 1.01 | 0.138            |
| Observations                                                  | 1869               |             |                  |
| R <sup>2</sup> Tjur                                           | 0.064              |             |                  |
| <i>Note: <sup>1</sup>Referent: Black or African American.</i> |                    |             |                  |

eFigure 1. Random Effects of Hospital Sites for Open Fracture Cohort

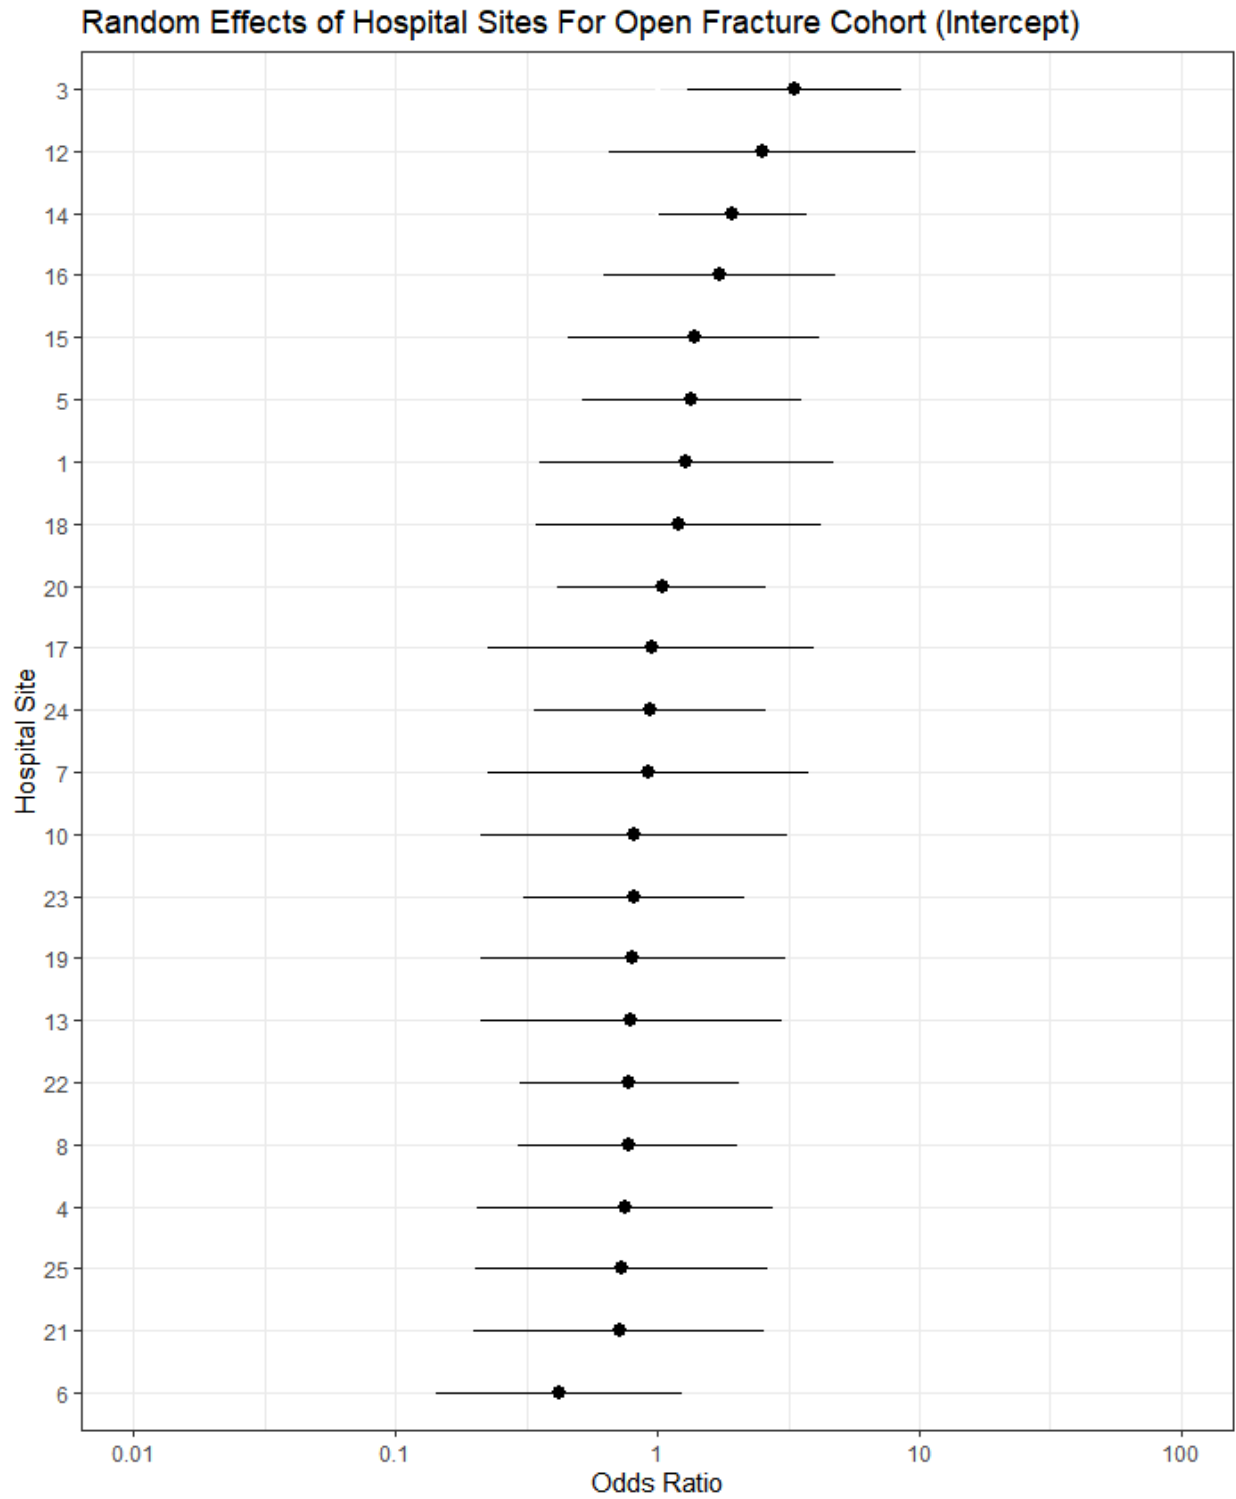

eFigure 2. Random Effects of Hospital Sites for Closed Fracture Cohort

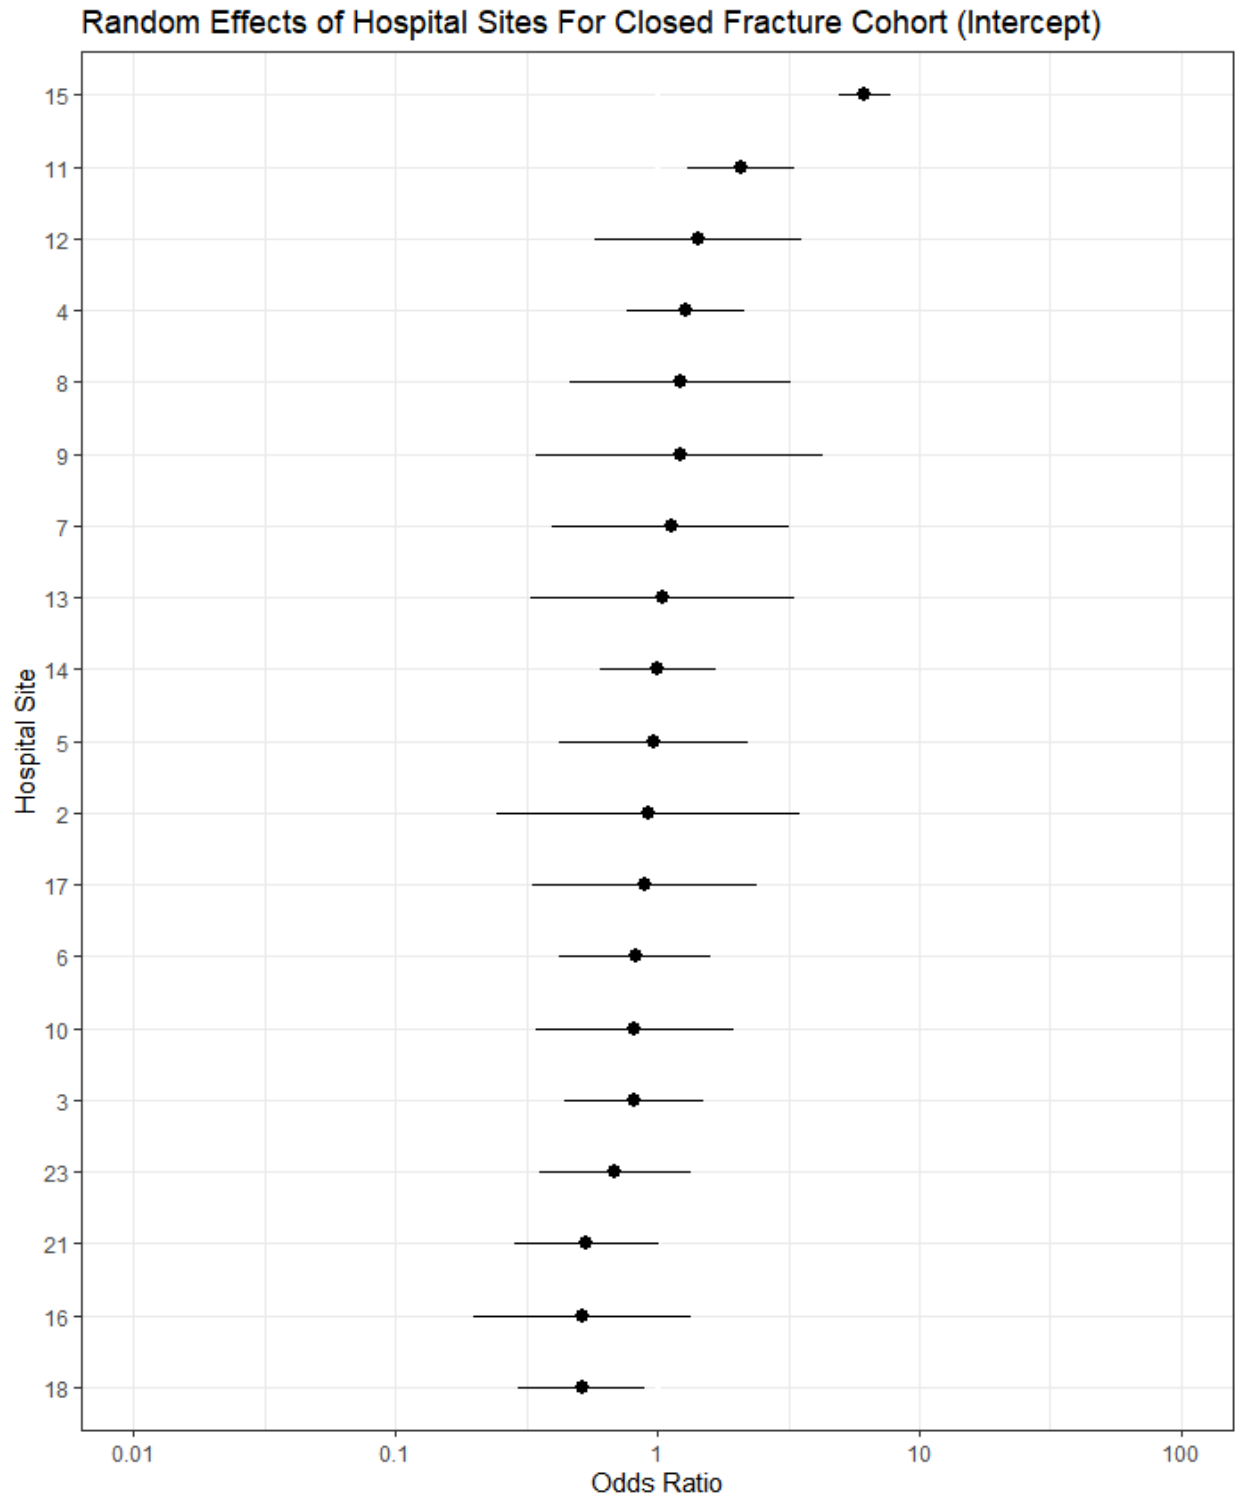

**eFigure 3. Hip and Femur Fracture Interaction Plot**

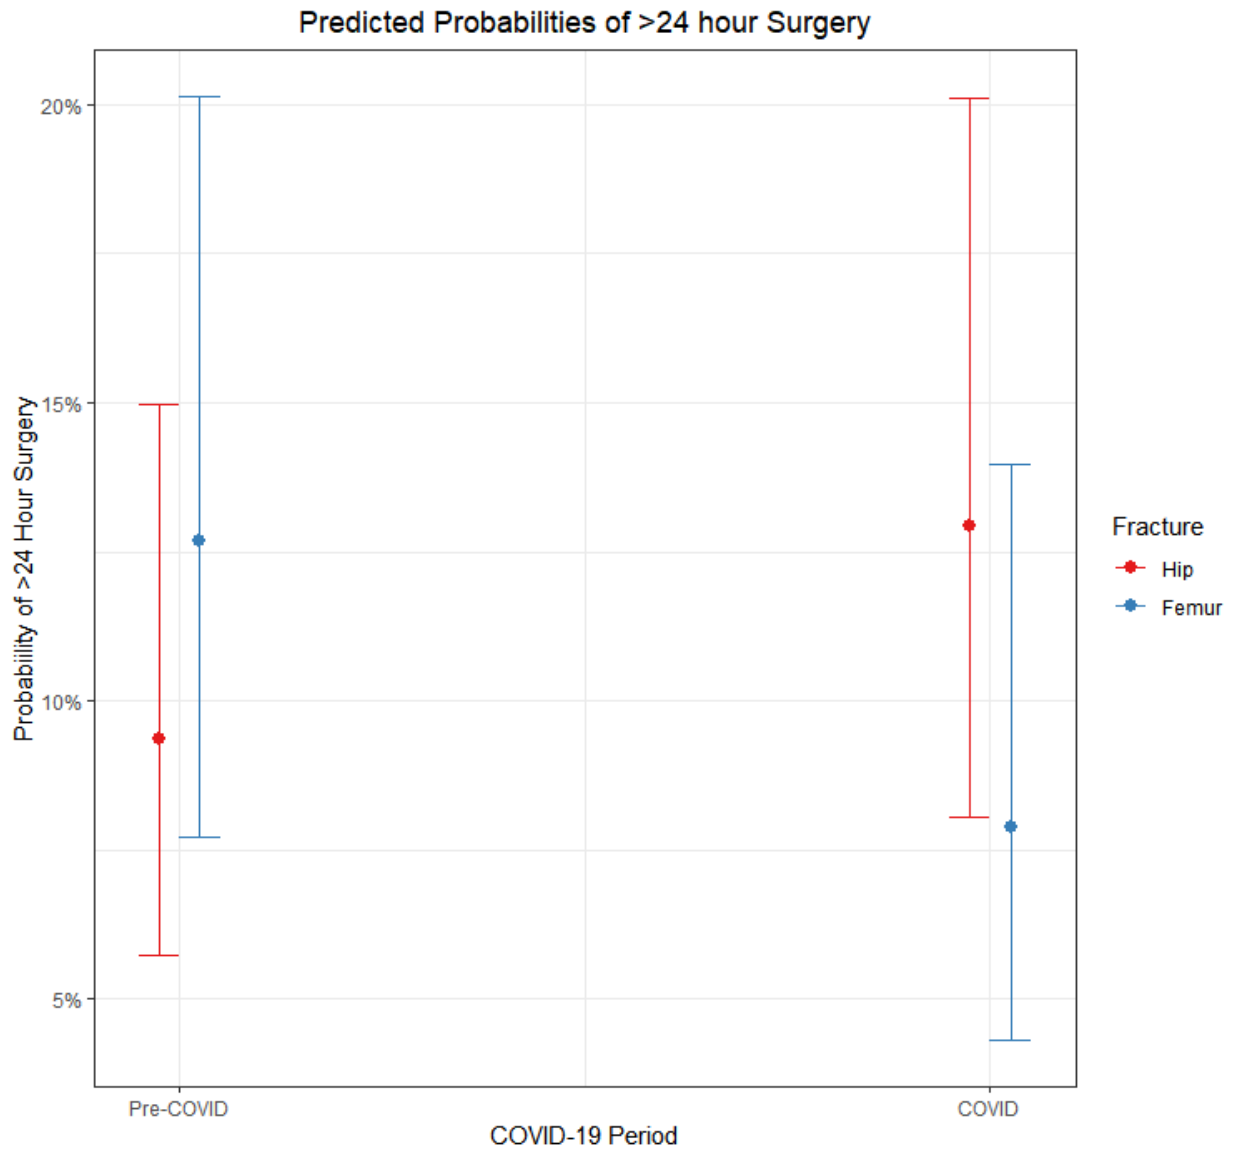

**eFigure 4. Patient Enrollment Plot**

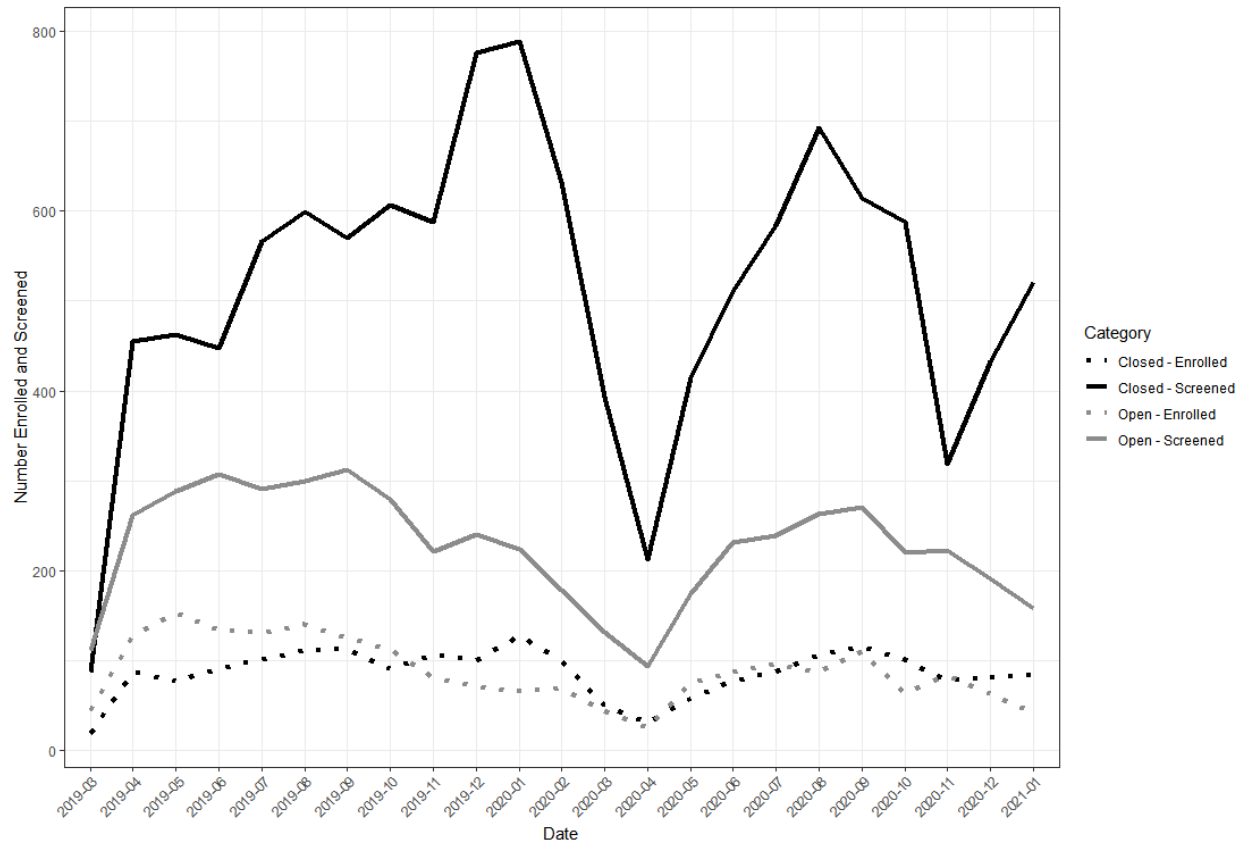

Supplement: jamahealthforum-e213460-s001.pdf [file jamahealthforum-e213460-s001.pdf]
