# Supplementary material for: Association of COVID-19 With Achieving Time-to-Surgery Benchmarks in Patients With Musculoskeletal Trauma
Source: PubMed Central journal article supplement (PMC8727030; doi:10.1001/jamahealthforum.2021.3460), 2021-10-29
Supplement: jamahealthforum-e213460-s002.pdf [file jamahealthforum-e213460-s002.pdf]

\*Indicates required information. Only first name, last name, and suffix will appear in PubMed.

| <b>*Group Name(s): PREP-IT Investigators</b> |                   |                              |                  |                                                |                                          |                                                         |                                                                                            |
|----------------------------------------------|-------------------|------------------------------|------------------|------------------------------------------------|------------------------------------------|---------------------------------------------------------|--------------------------------------------------------------------------------------------|
| <b>*First Name and Middle Initial(s)</b>     | <b>*Last Name</b> | <b>*Suffix (eg, Jr, III)</b> | Academic Degrees | Institution                                    | Location (city, state/province, country) | Role or Contribution, eg, chair, principal investigator | Group (if more than 1 Group listed in the byline) and/or Subgroup (eg, Steering Committee) |
| Gerard P.                                    | Slobogean         |                              | MD               | University of Maryland School of Medicine      | Baltimore, Maryland                      | Principal Investigator                                  | Executive Committee                                                                        |
| Sheila                                       | Sprague           |                              | PhD              | McMaster University                            | Hamilton, Ontario                        | Principal Investigator                                  | Executive Committee                                                                        |
| Jeffrey                                      | Wells             |                              |                  | Trauma Survivors Network                       | Falls Church, Virginia                   | Patient Representative                                  | Executive Committee                                                                        |
| Mohit                                        | Bhandari          |                              | MD, PhD          | McMaster University                            | Hamilton, Ontario                        | Principal Investigator                                  | Executive Committee                                                                        |
| Gerard P.                                    | Slobogean         |                              | MD               | University of Maryland School of Medicine      | Baltimore, Maryland                      | Co-Chair                                                | Steering Committee                                                                         |
| Mohit                                        | Bhandari          |                              | MD, PhD          | McMaster University                            | Hamilton, Ontario                        | Co-Chair                                                | Steering Committee                                                                         |
| Sheila                                       | Sprague           |                              | PhD              | McMaster University                            | Hamilton, Ontario                        | Co-Chair                                                | Steering Committee                                                                         |
| Jean-Claude                                  | D'Alleyrand       |                              |                  | Walter Reed National Military Medical Center   | Bethesda, MD                             | Committee Member                                        | Steering Committee                                                                         |
| Anthony D.                                   | Harris            |                              |                  | University of Maryland School of Medicine      | Baltimore, MD                            | Committee Member                                        | Steering Committee                                                                         |
| Daniel C.                                    | Mullins           |                              |                  | University of Maryland                         | Baltimore, MD                            | Committee Member                                        | Steering Committee                                                                         |
| Lehana                                       | Thabane           |                              |                  | McMaster University                            | Hamilton, Ontario                        | Committee Member                                        | Steering Committee                                                                         |
| Jeffrey                                      | Wells             |                              |                  | Trauma Survivors Network                       | Falls Church, Virginia                   | Patient Partner                                         | Steering Committee                                                                         |
| Amber                                        | Wood              |                              |                  | Association of periOperative Registered Nurses | Denver, CO                               | Committee Member                                        | Steering Committee                                                                         |
| Gregory J.                                   | Della Rocca       |                              |                  | University of Missouri                         | Columbia, MO                             | Chair                                                   | Adjudication Committee                                                                     |
| Anthony D.                                   | Harris            |                              |                  | University of Maryland School of Medicine      | Baltimore, MD                            | Committee Member                                        | Adjudication Committee                                                                     |
| Joan                                         | Hebden            |                              |                  | University of Maryland                         | Baltimore, MD                            | Committee Member                                        | Adjudication Committee                                                                     |
| Kyle J.                                      | Jeray             |                              |                  | Greenville Health System                       | Greenville, SC                           | Committee Member                                        | Adjudication Committee                                                                     |
| Lucas                                        | Marchand          |                              |                  | University of Maryland                         | Baltimore, MD                            | Committee Member                                        | Adjudication Committee                                                                     |

Supplemental Online Content: Nonauthor Collaborators

\*Indicates required information. Only first name, last name, and suffix will appear in PubMed.

| *First Name and Middle Initial(s) | *Last Name    | *Suffix (eg, Jr, III) | Academic Degrees | Institution                               | Location (city, state/province, country) | Role or Contribution, eg, chair, principal investigator | Group (if more than 1 Group listed in the byline) and/or Subgroup (eg, Steering Committee) |
|-----------------------------------|---------------|-----------------------|------------------|-------------------------------------------|------------------------------------------|---------------------------------------------------------|--------------------------------------------------------------------------------------------|
| Lyndsay M.                        | O'Hara        |                       |                  | University of Maryland School of Medicine | Baltimore, MD                            | Committee Member                                        | Adjudication Committee                                                                     |
| Robert                            | Zura          |                       |                  | LSU Health                                | New Orleans, LA                          | Committee Member                                        | Adjudication Committee                                                                     |
| Michael J.                        | Gardner       |                       |                  | Stanford University School of Medicine    | Palo Alto, CA                            | Chair                                                   | Data and Safety Monitoring Committee                                                       |
| Jenna                             | Blasman       |                       |                  |                                           | Kitchener, ON                            | Patient Representative                                  | Data and Safety Monitoring Committee                                                       |
| Jonah                             | Davies        |                       |                  | University of Washington                  | Seattle, WA                              | Committee Member                                        | Data and Safety Monitoring Committee                                                       |
| Stephen                           | Liang         |                       |                  | Washington University                     | St. Louis, MO                            | Committee Member                                        | Data and Safety Monitoring Committee                                                       |
| Monica                            | Taljaard      |                       |                  | Ottawa Hospital Research Institute        | Ottawa, ON                               | Committee Member                                        | Data and Safety Monitoring Committee                                                       |
| PJ                                | Devereaux     |                       |                  | McMaster University                       | Hamilton, Ontario                        | Committee Member                                        | Research Methodology Core                                                                  |
| Gordon H.                         | Guyatt        |                       |                  | McMaster University                       | Hamilton, Ontario                        | Committee Member                                        | Research Methodology Core                                                                  |
| Lehana                            | Thabane       |                       |                  | McMaster University                       | Hamilton, Ontario                        | Committee Member                                        | Research Methodology Core                                                                  |
| Diane                             | Heels-Ansdell |                       |                  | McMaster University                       | Hamilton, Ontario                        | Committee Member                                        | Research Methodology Core                                                                  |
| Debra                             | Marvel        |                       |                  |                                           | Baltimore, MD                            | Patient Representative                                  | Patient Centred Outcomes Core                                                              |
| Jana                              | Palmer        |                       |                  |                                           | Baltimore, MD                            | Patient Representative                                  | Patient Centred Outcomes Core                                                              |

Supplemental Online Content: Nonauthor Collaborators

\*Indicates required information. Only first name, last name, and suffix will appear in PubMed.

| *First Name and Middle Initial(s) | *Last Name  | *Suffix (eg, Jr, III) | Academic Degrees | Institution                                  | Location (city, state/province, country) | Role or Contribution, eg, chair, principal investigator | Group (if more than 1 Group listed in the byline) and/or Subgroup (eg, Steering Committee) |
|-----------------------------------|-------------|-----------------------|------------------|----------------------------------------------|------------------------------------------|---------------------------------------------------------|--------------------------------------------------------------------------------------------|
| Jeffrey                           | Wells       |                       |                  | Trauma Survivors Network                     | Baltimore, MD                            | Patient                                                 | Patient Centred Outcomes Core                                                              |
| Jeff                              | Friedrich   |                       |                  | Slate Magazine                               | Washington, DC                           | Editor                                                  | Patient Centred Outcomes Core                                                              |
| Daniel C.                         | Mullins     |                       |                  | University of Maryland                       | Baltimore, MD                            | Core Member                                             | Patient Centred Outcomes Core                                                              |
| Nathan N.                         | O'Hara      |                       |                  | University of Maryland School of Medicine    | Baltimore, MD                            | Core Member                                             | Patient Centred Outcomes Core                                                              |
| Frances                           | Grissom     |                       |                  | Trauma Survivor Network                      | Baltimore, MD                            | Core Member                                             | Patient Centred Outcomes Core                                                              |
| Gregory J.                        | Della Rocca |                       |                  | University of Missouri                       | Columbia, MO                             | Core Member                                             | Orthopaedic Surgery Core                                                                   |
| I. Leah                           | Gitajn      |                       |                  | Dartmouth University                         | Hanover, NH                              | Core Member                                             | Orthopaedic Surgery Core                                                                   |
| Kyle J.                           | Jeray       |                       |                  | Greenville Health System                     | Greenville, SC                           | Core Member                                             | Orthopaedic Surgery Core                                                                   |
| Saam                              | Morshed     |                       |                  | San Francisco General Hospital               | San Francisco, CA                        | Core Member                                             | Orthopaedic Surgery Core                                                                   |
| Robert V.                         | O'Toole     |                       |                  | University of Maryland School of Medicine    | Baltimore, MD                            | Core Member                                             | Orthopaedic Surgery Core                                                                   |
| Brad A.                           | Petrisor    |                       |                  | Hamilton Health Sciences                     | Hamilton, Ontario                        | Core Member                                             | Orthopaedic Surgery Core                                                                   |
| Megan                             | Camara      |                       |                  | R Adams Cowley Shock Trauma Center           | Baltimore, MD                            | Core Member                                             | Operating Room Core                                                                        |
| Franca                            | Mossuto     |                       |                  | Hamilton Health Sciences                     | Hamilton, Ontario                        | Core Member                                             | Operating Room Core                                                                        |
| Anthony D.                        | Harris      |                       |                  | University of Maryland School of Medicine    | Baltimore, MD                            | Core Member                                             | Infectious Disease Core                                                                    |
| Manjari G.                        | Joshi       |                       |                  | University of Maryland School of Medicine    | Baltimore, MD                            | Core Member                                             | Infectious Disease Core                                                                    |
| Jean-Claude                       | D'Alleyrand |                       |                  | Walter Reed National Military Medical Center | Bethesda, MD                             | Core Member                                             | Military Core                                                                              |
| Justin                            | Fowler      |                       |                  | United States Army                           | USA                                      | Core Member                                             | Military Core                                                                              |

## Supplemental Online Content: Nonauthor Collaborators

\*Indicates required information. Only first name, last name, and suffix will appear in PubMed.

| *First Name and Middle Initial(s) | *Last Name    | *Suffix (eg, Jr, III) | Academic Degrees | Institution                               | Location (city, state/province, country) | Role or Contribution, eg, chair, principal investigator | Group (if more than 1 Group listed in the byline) and/or Subgroup (eg, Steering Committee) |
|-----------------------------------|---------------|-----------------------|------------------|-------------------------------------------|------------------------------------------|---------------------------------------------------------|--------------------------------------------------------------------------------------------|
| Jessica                           | Rivera        |                       |                  | San Antonio Military Medical Center       | San Antonio, TX                          | Core Member                                             | Military Core                                                                              |
| Max                               | Talbot        |                       |                  | Canadian Armed Forces                     | Montreal, QC                             | Core Member                                             | Military Core                                                                              |
| Sheila                            | Sprague       |                       | PhD              | McMaster University                       | Hamilton, Ontario                        | Principal Investigator                                  | McMaster University Methods Centre                                                         |
| Mohit                             | Bhandari      |                       | MD, PhD          | McMaster University                       | Hamilton, Ontario                        | Principal Investigator                                  | McMaster University Methods Centre                                                         |
| Shannon                           | Dodds         |                       |                  | McMaster University                       | Hamilton, Ontario                        | Research Coordinator                                    | McMaster University Methods Centre                                                         |
| Alisha                            | Garibaldi     |                       |                  | McMaster University                       | Hamilton, Ontario                        | Research Coordinator                                    | McMaster University Methods Centre                                                         |
| Silvia                            | Li            |                       | MSc              | McMaster University                       | Hamilton, Ontario                        | Research Coordinator                                    | McMaster University Methods Centre                                                         |
| Uyen                              | Nguyen        |                       | PhD              | McMaster University                       | Hamilton, Ontario                        | Research Coordinator                                    | McMaster University Methods Centre                                                         |
| David                             | Pogorzelski   |                       |                  | McMaster University                       | Hamilton, Ontario                        | Research Coordinator                                    | McMaster University Methods Centre                                                         |
| Alejandra                         | Rojas         |                       |                  | McMaster University                       | Hamilton, Ontario                        | Research Coordinator                                    | McMaster University Methods Centre                                                         |
| Taryn                             | Scott         |                       |                  | McMaster University                       | Hamilton, Ontario                        | Research Coordinator                                    | McMaster University Methods Centre                                                         |
| Gina                              | Del Fabbro    |                       | BPH              | McMaster University                       | Hamilton, Ontario                        | Research Coordinator                                    | McMaster University Methods Centre                                                         |
| Olivia P.                         | Szasz         |                       |                  | McMaster University                       | Hamilton, Ontario                        | Research Assistant                                      | McMaster University Methods Centre                                                         |
| Diane                             | Heels-Ansdell |                       |                  | McMaster University                       | Hamilton, Ontario                        | Statistician                                            | McMaster University Methods Centre                                                         |
| Paula                             | McKay         |                       | BSc              | McMaster University                       | Hamilton, Ontario                        | Manager                                                 | McMaster University Methods Centre                                                         |
| Gerard P.                         | Slobogean     |                       |                  | University of Maryland School of Medicine | Baltimore, MD                            | Principal Investigator                                  | University of Maryland School of Medicine Administrative Center                            |

## Supplemental Online Content: Nonauthor Collaborators

\*Indicates required information. Only first name, last name, and suffix will appear in PubMed.

| *First Name and Middle Initial(s) | *Last Name    | *Suffix (eg, Jr, III) | Academic Degrees | Institution                               | Location (city, state/province, country) | Role or Contribution, eg, chair, principal investigator      | Group (if more than 1 Group listed in the byline) and/or Subgroup (eg, Steering Committee) |
|-----------------------------------|---------------|-----------------------|------------------|-------------------------------------------|------------------------------------------|--------------------------------------------------------------|--------------------------------------------------------------------------------------------|
| Nathan N.                         | O'Hara        |                       |                  | University of Maryland School of Medicine | Baltimore, MD                            | Manager                                                      | University of Maryland School of Medicine Administrative Center                            |
| Andrea                            | Howe          |                       |                  | University of Maryland School of Medicine | Baltimore, MD                            | Project Manager                                              | University of Maryland School of Medicine Administrative Center                            |
| Joshua                            | Rudnicki      |                       |                  | University of Maryland School of Medicine | Baltimore, MD                            | Project Manager                                              | University of Maryland School of Medicine Administrative Center                            |
| Haley                             | Demyanovich   |                       |                  | University of Maryland School of Medicine | Baltimore, MD                            | Project Manager                                              | University of Maryland School of Medicine Administrative Center                            |
| Kelly                             | Little        |                       |                  | University of Maryland School of Medicine | Baltimore, MD                            | Financial Manager                                            | University of Maryland School of Medicine Administrative Center                            |
| Adam                              | Boissonneault |                       |                  | University of Maryland School of Medicine | Baltimore, MD                            | Co-Investigator                                              | University of Maryland School of Medicine Administrative Center                            |
| Daniel C.                         | Mullins       |                       |                  | University of Maryland School of Pharmacy | Baltimore, MD                            | Executive Director                                           | University of Maryland School of Pharmacy, The PATIENTS Program                            |
| Michelle                          | Medeiros      |                       |                  | University of Maryland School of Pharmacy | Baltimore, MD                            | Director or Research                                         | University of Maryland School of Pharmacy, The PATIENTS Program                            |
| Genevieve                         | Polk          |                       |                  | University of Maryland School of Pharmacy | Baltimore, MD                            | Assistant Director, Dissemination and Research               | University of Maryland School of Pharmacy, The PATIENTS Program                            |
| Eric                              | Kettering     |                       |                  | University of Maryland School of Pharmacy | Baltimore, MD                            | Senior Instructional Technology and Dissemination Specialist | University of Maryland School of Pharmacy, The PATIENTS Program                            |

## Supplemental Online Content: Nonauthor Collaborators

\*Indicates required information. Only first name, last name, and suffix will appear in PubMed.

| *First Name and Middle Initial(s) | *Last Name  | *Suffix (eg, Jr, III) | Academic Degrees | Institution                                                                   | Location (city, state/province, country) | Role or Contribution, eg, chair, principal investigator | Group (if more than 1 Group listed in the byline) and/or Subgroup (eg, Steering Committee) |
|-----------------------------------|-------------|-----------------------|------------------|-------------------------------------------------------------------------------|------------------------------------------|---------------------------------------------------------|--------------------------------------------------------------------------------------------|
| Diamond                           | Hale        |                       |                  | University of Maryland School of Pharmacy                                     | Baltimore, MD                            | Project Manager                                         | University of Maryland School of Pharmacy, The PATIENTS Program                            |
| Nirmen                            | Mahal       |                       |                  | University of Maryland School of Pharmacy                                     | Baltimore, MD                            | Program Specialist                                      | University of Maryland School of Pharmacy, The PATIENTS Program                            |
| Robert V.                         | O'Toole     |                       |                  | University of Maryland School of Medicine, R Adams Cowley Shock Trauma Center | Baltimore, MD                            | Co-Investigator                                         | Lead Clinical Site (Aqueous-PREP and PREPARE)                                              |
| Jean-Claude                       | D'Alleyrand |                       |                  | University of Maryland School of Medicine, R Adams Cowley Shock Trauma Center | Baltimore, MD                            | Co-Investigator                                         | Lead Clinical Site (Aqueous-PREP and PREPARE)                                              |
| Andrew                            | Eglseder    |                       |                  | University of Maryland School of Medicine, R Adams Cowley Shock Trauma Center | Baltimore, MD                            | Co-Investigator                                         | Lead Clinical Site (Aqueous-PREP and PREPARE)                                              |
| Aaron                             | Johnson     |                       |                  | University of Maryland School of Medicine, R Adams Cowley Shock Trauma Center | Baltimore, MD                            | Co-Investigator                                         | Lead Clinical Site (Aqueous-PREP and PREPARE)                                              |
| Christopher                       | Langhammer  |                       |                  | University of Maryland School of Medicine, R Adams Cowley Shock Trauma Center | Baltimore, MD                            | Co-Investigator                                         | Lead Clinical Site (Aqueous-PREP and PREPARE)                                              |
| Christopher                       | Lebrun      |                       |                  | University of Maryland School of Medicine, R Adams Cowley Shock Trauma Center | Baltimore, MD                            | Co-Investigator                                         | Lead Clinical Site (Aqueous-PREP and PREPARE)                                              |
| Theodore                          | Manson      |                       |                  | University of Maryland School of Medicine, R Adams Cowley Shock Trauma Center | Baltimore, MD                            | Co-Investigator                                         | Lead Clinical Site (Aqueous-PREP and PREPARE)                                              |
| Jason                             | Nascone     |                       |                  | University of Maryland School of Medicine, R Adams Cowley Shock Trauma Center | Baltimore, MD                            | Co-Investigator                                         | Lead Clinical Site (Aqueous-PREP and PREPARE)                                              |

## Supplemental Online Content: Nonauthor Collaborators

\*Indicates required information. Only first name, last name, and suffix will appear in PubMed.

| *First Name and Middle Initial(s) | *Last Name  | *Suffix (eg, Jr, III) | Academic Degrees | Institution                                                                   | Location (city, state/province, country) | Role or Contribution, eg, chair, principal investigator | Group (if more than 1 Group listed in the byline) and/or Subgroup (eg, Steering Committee) |
|-----------------------------------|-------------|-----------------------|------------------|-------------------------------------------------------------------------------|------------------------------------------|---------------------------------------------------------|--------------------------------------------------------------------------------------------|
| Ebrahim                           | Paryavi     |                       |                  | University of Maryland School of Medicine, R Adams Cowley Shock Trauma Center | Baltimore, MD                            | Co-Investigator                                         | Lead Clinical Site (Aqueous-PREP and PREPARE)                                              |
| Raymond                           | Pensy       |                       |                  | University of Maryland School of Medicine, R Adams Cowley Shock Trauma Center | Baltimore, MD                            | Co-Investigator                                         | Lead Clinical Site (Aqueous-PREP and PREPARE)                                              |
| Andrew                            | Pollak      |                       |                  | University of Maryland School of Medicine, R Adams Cowley Shock Trauma Center | Baltimore, MD                            | Co-Investigator                                         | Lead Clinical Site (Aqueous-PREP and PREPARE)                                              |
| Marcus                            | Sciadini    |                       |                  | University of Maryland School of Medicine, R Adams Cowley Shock Trauma Center | Baltimore, MD                            | Co-Investigator                                         | Lead Clinical Site (Aqueous-PREP and PREPARE)                                              |
| Gerard P.                         | Slobogean   |                       |                  | University of Maryland School of Medicine, R Adams Cowley Shock Trauma Center | Baltimore, MD                            | Local Principal Investigator                            | Lead Clinical Site (Aqueous-PREP and PREPARE)                                              |
| Yasmin                            | Degano      |                       |                  | University of Maryland School of Medicine, R Adams Cowley Shock Trauma Center | Baltimore, MD                            | Research Assistant                                      | Lead Clinical Site (Aqueous-PREP and PREPARE)                                              |
| Haley K.                          | Demyanovich |                       |                  | University of Maryland School of Medicine, R Adams Cowley Shock Trauma Center | Baltimore, MD                            | Research Coordinator                                    | Lead Clinical Site (Aqueous-PREP and PREPARE)                                              |
| Andrea                            | Howe        |                       |                  | University of Maryland School of Medicine, R Adams Cowley Shock Trauma Center | Baltimore, MD                            | Research Coordinator                                    | Lead Clinical Site (Aqueous-PREP and PREPARE)                                              |
| Nathan N.                         | O'Hara      |                       |                  | University of Maryland School of Medicine, R Adams Cowley Shock Trauma Center | Baltimore, MD                            | Manager                                                 | Lead Clinical Site (Aqueous-PREP and PREPARE)                                              |
| Katherine                         | Joseph      |                       |                  | University of Maryland School of Medicine, R Adams Cowley Shock Trauma Center | Baltimore, MD                            | Research Coordinator                                    | Lead Clinical Site (Aqueous-PREP and PREPARE)                                              |

## Supplemental Online Content: Nonauthor Collaborators

\*Indicates required information. Only first name, last name, and suffix will appear in PubMed.

| *First Name and Middle Initial(s) | *Last Name | *Suffix (eg, Jr, III) | Academic Degrees | Institution                                                                   | Location (city, state/province, country) | Role or Contribution, eg, chair, principal investigator | Group (if more than 1 Group listed in the byline) and/or Subgroup (eg, Steering Committee) |
|-----------------------------------|------------|-----------------------|------------------|-------------------------------------------------------------------------------|------------------------------------------|---------------------------------------------------------|--------------------------------------------------------------------------------------------|
| Joshua                            | Rudnicki   |                       |                  | University of Maryland School of Medicine, R Adams Cowley Shock Trauma Center | Baltimore, MD                            | Research Coordinator                                    | Lead Clinical Site (Aqueous-PREP and PREPARE)                                              |
| Megan                             | Camara     |                       |                  | University of Maryland School of Medicine, R Adams Cowley Shock Trauma Center | Baltimore, MD                            | Research Coordinator                                    | Lead Clinical Site (Aqueous-PREP and PREPARE)                                              |
| Lucas                             | Marchand   |                       |                  | University of Maryland School of Medicine, R Adams Cowley Shock Trauma Center | Baltimore, MD                            | Co-Investigator                                         | Lead Clinical Site (Aqueous-PREP and PREPARE)                                              |
| Heather                           | Phipps     |                       |                  | University of Maryland School of Medicine, R Adams Cowley Shock Trauma Center | Baltimore, MD                            | Research Coordinator                                    | Lead Clinical Site (Aqueous-PREP and PREPARE)                                              |
| Eric                              | Hempen     |                       |                  | University of Maryland School of Medicine, R Adams Cowley Shock Trauma Center | Baltimore, MD                            | Research Coordinator                                    | Lead Clinical Site (Aqueous-PREP and PREPARE)                                              |
| Brad A.                           | Petrisor   |                       |                  | Hamilton Health Sciences – General Site                                       | Hamilton, ON                             | Local Principal Investigator                            | Aqueous-PREP and PREPARE                                                                   |
| Herman                            | Johal      |                       |                  | Hamilton Health Sciences – General Site                                       | Hamilton, ON                             | Local Principal Investigator                            | Aqueous-PREP and PREPARE                                                                   |
| Bill                              | Ristevski  |                       |                  | Hamilton Health Sciences – General Site                                       | Hamilton, ON                             | Co-Investigator                                         | Aqueous-PREP and PREPARE                                                                   |
| Dale                              | Williams   |                       |                  | Hamilton Health Sciences – General Site                                       | Hamilton, ON                             | Co-Investigator                                         | Aqueous-PREP and PREPARE                                                                   |
| Matthew                           | Denkers    |                       |                  | Hamilton Health Sciences – General Site                                       | Hamilton, ON                             | Co-Investigator                                         | Aqueous-PREP and PREPARE                                                                   |
| Krishan                           | Rajaratnam |                       |                  | Hamilton Health Sciences – General Site                                       | Hamilton, ON                             | Co-Investigator                                         | Aqueous-PREP and PREPARE                                                                   |
| Jamal                             | Al-Asiri   |                       |                  | Hamilton Health Sciences – General Site                                       | Hamilton, ON                             | Co-Investigator                                         | Aqueous-PREP and PREPARE                                                                   |
| Jordan                            | Leonard    |                       |                  | Hamilton Health Sciences – General Site                                       | Hamilton, ON                             | Research Coordinator                                    | Aqueous-PREP and PREPARE                                                                   |



## Supplemental Online Content: Nonauthor Collaborators

\*Indicates required information. Only first name, last name, and suffix will appear in PubMed.

| *First Name and Middle Initial(s) | *Last Name        | *Suffix (eg, Jr, III) | Academic Degrees | Institution                             | Location (city, state/province, country) | Role or Contribution, eg, chair, principal investigator | Group (if more than 1 Group listed in the byline) and/or Subgroup (eg, Steering Committee) |
|-----------------------------------|-------------------|-----------------------|------------------|-----------------------------------------|------------------------------------------|---------------------------------------------------------|--------------------------------------------------------------------------------------------|
| Francesc A.                       | Marcano-Fernández |                       |                  | Hamilton Health Sciences – General Site | Hamilton, ON                             | Clinical Research Coordinator                           | Aqueous-PREP and PREPARE                                                                   |
| Jodi                              | Gallant           |                       |                  | Hamilton Health Sciences – General Site | Hamilton, ON                             | Clinical Research Coordinator                           | Aqueous-PREP and PREPARE                                                                   |
| Federico                          | Persico           |                       |                  | Hamilton Health Sciences – General Site | Hamilton, ON                             | Clinical Research Coordinator                           | Aqueous-PREP and PREPARE                                                                   |
| Marko                             | Gjorgjievski      |                       |                  | Hamilton Health Sciences – General Site | Hamilton, ON                             | Clinical Research Coordinator                           | Aqueous-PREP and PREPARE                                                                   |
| Annie                             | George            |                       |                  | Hamilton Health Sciences – General Site | Hamilton, ON                             | Clinical Research Coordinator                           | Aqueous-PREP and PREPARE                                                                   |
| Sarah M.                          | McGaugh           |                       |                  | Hamilton Health Sciences – General Site | Hamilton, ON                             | Clinical Research Coordinator                           | Aqueous-PREP and PREPARE                                                                   |
| Kaitlyn                           | Pusztai           |                       |                  | Hamilton Health Sciences – General Site | Hamilton, ON                             | Clinical Research Coordinator                           | Aqueous-PREP and PREPARE                                                                   |
| Sarah                             | Piekarski         |                       |                  | Hamilton Health Sciences – General Site | Hamilton, ON                             | Clinical Research Coordinator                           | Aqueous-PREP and PREPARE                                                                   |
| Mavis                             | Lyons             |                       |                  | Hamilton Health Sciences – General Site | Hamilton, ON                             | Clinical Research Coordinator                           | Aqueous-PREP and PREPARE                                                                   |
| Julia                             | Gennaccaro        |                       |                  | Hamilton Health Sciences – General Site | Hamilton, ON                             | Clinical Research Coordinator                           | Aqueous-PREP and PREPARE                                                                   |
| Roman N.                          | Natoli            |                       |                  | IU Health Methodist Hospital            | Indianapolis, IN                         | Local Principal Investigator                            | Aqueous-PREP and PREPARE                                                                   |
| Greg E.                           | Gaski             |                       |                  | IU Health Methodist Hospital            | Indianapolis, IN                         | Co-Investigator                                         | Aqueous-PREP and PREPARE                                                                   |
| Todd O.                           | McKinley          |                       |                  | IU Health Methodist Hospital            | Indianapolis, IN                         | Co-Investigator                                         | Aqueous-PREP and PREPARE                                                                   |
| Walter W.                         | Virkus            |                       |                  | IU Health Methodist Hospital            | Indianapolis, IN                         | Co-Investigator                                         | Aqueous-PREP and PREPARE                                                                   |
| Anthony T.                        | Sorkin            |                       |                  | IU Health Methodist Hospital            | Indianapolis, IN                         | Co-Investigator                                         | Aqueous-PREP and PREPARE                                                                   |
| Jan P.                            | Szatkowski        |                       |                  | IU Health Methodist Hospital            | Indianapolis, IN                         | Co-Investigator                                         | Aqueous-PREP and PREPARE                                                                   |

## Supplemental Online Content: Nonauthor Collaborators

\*Indicates required information. Only first name, last name, and suffix will appear in PubMed.

| *First Name and Middle Initial(s) | *Last Name | *Suffix (eg, Jr, III) | Academic Degrees | Institution                         | Location (city, state/province, country) | Role or Contribution, eg, chair, principal investigator | Group (if more than 1 Group listed in the byline) and/or Subgroup (eg, Steering Committee) |
|-----------------------------------|------------|-----------------------|------------------|-------------------------------------|------------------------------------------|---------------------------------------------------------|--------------------------------------------------------------------------------------------|
| Joseph R.                         | Baele      |                       |                  | IU Health Methodist Hospital        | Indianapolis, IN                         | Co-Investigator                                         | Aqueous-PREP and PREPARE                                                                   |
| Brian H.                          | Mullis     |                       |                  | IU Health Methodist Hospital        | Indianapolis, IN                         | Co-Investigator                                         | Aqueous-PREP and PREPARE                                                                   |
| Yohan                             | Jang       |                       |                  |                                     |                                          |                                                         |                                                                                            |
| Lauren C.                         | Hill       |                       |                  | IU Health Methodist Hospital        | Indianapolis, IN                         | Research Coordinator                                    | Aqueous-PREP and PREPARE                                                                   |
| Andrea                            | Hudgins    |                       |                  | IU Health Methodist Hospital        | Indianapolis, IN                         | Research Coordinator                                    | Aqueous-PREP and PREPARE                                                                   |
| Courtney L.                       | Fentz      |                       |                  | IU Health Methodist Hospital        | Indianapolis, IN                         | Research Coordinator                                    | Aqueous-PREP and PREPARE                                                                   |
| Maricela M.                       | Diaz       |                       |                  | IU Health Methodist Hospital        | Indianapolis, IN                         | Research Coordinator                                    | Aqueous-PREP and PREPARE                                                                   |
| Katelyn M.                        | Garst      |                       |                  | IU Health Methodist Hospital        | Indianapolis, IN                         | Research Coordinator                                    | Aqueous-PREP and PREPARE                                                                   |
| Emma W.                           | Denari     |                       |                  | IU Health Methodist Hospital        | Indianapolis, IN                         | Research Coordinator                                    | Aqueous-PREP and PREPARE                                                                   |
| Patrick                           | Osborn     |                       |                  | San Antonio Military Medical Center | San Antonio, TX                          | Local Principal Investigator                            | Aqueous-PREP and PREPARE                                                                   |
| Justin                            | Fowler     |                       |                  | San Antonio Military Medical Center | San Antonio, TX                          | Co-Investigator                                         | Aqueous-PREP and PREPARE                                                                   |
| Sarah                             | Pierrie    |                       |                  | San Antonio Military Medical Center | San Antonio, TX                          | Local Principal Investigator/Co-Investigator            | Aqueous-PREP and PREPARE                                                                   |
| Eric                              | Martinez   |                       |                  | San Antonio Military Medical Center | San Antonio, TX                          | Research Coordinator                                    | Aqueous-PREP and PREPARE                                                                   |
| Joseph                            | Kimmel     |                       |                  | San Antonio Military Medical Center | San Antonio, TX                          | Research Coordinator                                    | Aqueous-PREP and PREPARE                                                                   |
| Kyle J.                           | Jeray      |                       |                  | Prisma Health - Upstate             | Greenville, SC                           | Local Principal Investigator                            | Aqueous-PREP and PREPARE                                                                   |
| John D.                           | Adams      |                       |                  | Prisma Health - Upstate             | Greenville, SC                           | Co-Investigator                                         | Aqueous-PREP and PREPARE                                                                   |

## Supplemental Online Content: Nonauthor Collaborators

\*Indicates required information. Only first name, last name, and suffix will appear in PubMed.

| *First Name and Middle Initial(s) | *Last Name | *Suffix (eg, Jr, III) | Academic Degrees | Institution             | Location (city, state/province, country) | Role or Contribution, eg, chair, principal investigator | Group (if more than 1 Group listed in the byline) and/or Subgroup (eg, Steering Committee) |
|-----------------------------------|------------|-----------------------|------------------|-------------------------|------------------------------------------|---------------------------------------------------------|--------------------------------------------------------------------------------------------|
| Michael L.                        | Beckish    |                       |                  | Prisma Health - Upstate | Greenville, SC                           | Co-Investigator                                         | Aqueous-PREP and PREPARE                                                                   |
| Christopher C.                    | Bray       |                       |                  | Prisma Health - Upstate | Greenville, SC                           | Co-Investigator                                         | Aqueous-PREP and PREPARE                                                                   |
| Timothy R.                        | Brown      |                       |                  | Prisma Health - Upstate | Greenville, SC                           | Co-Investigator                                         | Aqueous-PREP and PREPARE                                                                   |
| Andrew W.                         | Cross      |                       |                  | Prisma Health - Upstate | Greenville, SC                           | Co-Investigator                                         | Aqueous-PREP and PREPARE                                                                   |
| Timothy                           | Dew        |                       |                  | Prisma Health - Upstate | Greenville, SC                           | Co-Investigator                                         | Aqueous-PREP and PREPARE                                                                   |
| Gregory K.                        | Faucher    |                       |                  | Prisma Health - Upstate | Greenville, SC                           | Co-Investigator                                         | Aqueous-PREP and PREPARE                                                                   |
| Richard W.                        | Gurich     | Jr.                   |                  | Prisma Health - Upstate | Greenville, SC                           | Co-Investigator                                         | Aqueous-PREP and PREPARE                                                                   |
| David E.                          | Lazarus    |                       |                  | Prisma Health - Upstate | Greenville, SC                           | Co-Investigator                                         | Aqueous-PREP and PREPARE                                                                   |
| S. John                           | Millon     |                       |                  | Prisma Health - Upstate | Greenville, SC                           | Co-Investigator                                         | Aqueous-PREP and PREPARE                                                                   |
| M. Jason                          | Palmer     |                       |                  | Prisma Health - Upstate | Greenville, SC                           | Co-Investigator                                         | Aqueous-PREP and PREPARE                                                                   |
| Scott E.                          | Porter     |                       |                  | Prisma Health - Upstate | Greenville, SC                           | Co-Investigator                                         | Aqueous-PREP and PREPARE                                                                   |
| Thomas M.                         | Schaller   |                       |                  | Prisma Health - Upstate | Greenville, SC                           | Co-Investigator                                         | Aqueous-PREP and PREPARE                                                                   |
| Michael S.                        | Sridhar    |                       |                  | Prisma Health - Upstate | Greenville, SC                           | Co-Investigator                                         | Aqueous-PREP and PREPARE                                                                   |
| John L.                           | Sanders    |                       |                  | Prisma Health - Upstate | Greenville, SC                           | Co-Investigator                                         | Aqueous-PREP and PREPARE                                                                   |
| L. Edwin                          | Rudisill   | Jr.                   |                  | Prisma Health - Upstate | Greenville, SC                           | Co-Investigator                                         | Aqueous-PREP and PREPARE                                                                   |
| Michael J.                        | Garitty    |                       |                  | Prisma Health - Upstate | Greenville, SC                           | Co-Investigator                                         | Aqueous-PREP and PREPARE                                                                   |

## Supplemental Online Content: Nonauthor Collaborators

\*Indicates required information. Only first name, last name, and suffix will appear in PubMed.

| *First Name and Middle Initial(s) | *Last Name  | *Suffix (eg, Jr, III) | Academic Degrees | Institution             | Location (city, state/province, country) | Role or Contribution, eg, chair, principal investigator | Group (if more than 1 Group listed in the byline) and/or Subgroup (eg, Steering Committee) |
|-----------------------------------|-------------|-----------------------|------------------|-------------------------|------------------------------------------|---------------------------------------------------------|--------------------------------------------------------------------------------------------|
| Andrew S.                         | Poole       |                       |                  | Prisma Health - Upstate | Greenville, SC                           | Co-Investigator                                         | Aqueous-PREP and PREPARE                                                                   |
| Michael L.                        | Sims        |                       |                  | Prisma Health - Upstate | Greenville, SC                           | Co-Investigator                                         | Aqueous-PREP and PREPARE                                                                   |
| Robert M.                         | Carlisle    | II                    |                  | Prisma Health - Upstate | Greenville, SC                           | Co-Investigator                                         | Aqueous-PREP and PREPARE                                                                   |
| Erin                              | Adams-Hofer |                       |                  | Prisma Health - Upstate | Greenville, SC                           | Co-Investigator                                         | Aqueous-PREP and PREPARE                                                                   |
| Brandon S.                        | Huggins     |                       |                  | Prisma Health - Upstate | Greenville, SC                           | Co-Investigator                                         | Aqueous-PREP and PREPARE                                                                   |
| Michael D.                        | Hunter      |                       |                  | Prisma Health - Upstate | Greenville, SC                           | Co-Investigator                                         | Aqueous-PREP and PREPARE                                                                   |
| William A.                        | Marshall    |                       |                  | Prisma Health - Upstate | Greenville, SC                           | Co-Investigator                                         | Aqueous-PREP and PREPARE                                                                   |
| Shea                              | Bielby Ray  |                       |                  | Prisma Health - Upstate | Greenville, SC                           | Co-Investigator                                         | Aqueous-PREP and PREPARE                                                                   |
| Cory D.                           | Smith       |                       |                  | Prisma Health - Upstate | Greenville, SC                           | Co-Investigator                                         | Aqueous-PREP and PREPARE                                                                   |
| Kyle M.                           | Altman      |                       |                  | Prisma Health - Upstate | Greenville, SC                           | Co-Investigator                                         | Aqueous-PREP and PREPARE                                                                   |
| Julia C.                          | Bedard      |                       |                  | Prisma Health - Upstate | Greenville, SC                           | Co-Investigator                                         | Aqueous-PREP and PREPARE                                                                   |
| Markus F.                         | Loeffler    |                       |                  | Prisma Health - Upstate | Greenville, SC                           | Co-Investigator                                         | Aqueous-PREP and PREPARE                                                                   |
| Erin R.                           | Pichiotino  |                       |                  | Prisma Health - Upstate | Greenville, SC                           | Co-Investigator                                         | Aqueous-PREP and PREPARE                                                                   |
| Austin A.                         | Cole        |                       |                  | Prisma Health - Upstate | Greenville, SC                           | Co-Investigator                                         | Aqueous-PREP and PREPARE                                                                   |
| Ethan J.                          | Maltz       |                       |                  | Prisma Health - Upstate | Greenville, SC                           | Co-Investigator                                         | Aqueous-PREP and PREPARE                                                                   |
| Wesley                            | Parker      |                       |                  | Prisma Health - Upstate | Greenville, SC                           | Co-Investigator                                         | Aqueous-PREP and PREPARE                                                                   |

## Supplemental Online Content: Nonauthor Collaborators

\*Indicates required information. Only first name, last name, and suffix will appear in PubMed.

| *First Name and Middle Initial(s) | *Last Name | *Suffix (eg, Jr, III) | Academic Degrees | Institution             | Location (city, state/province, country) | Role or Contribution, eg, chair, principal investigator | Group (if more than 1 Group listed in the byline) and/or Subgroup (eg, Steering Committee) |
|-----------------------------------|------------|-----------------------|------------------|-------------------------|------------------------------------------|---------------------------------------------------------|--------------------------------------------------------------------------------------------|
| T. Bennett                        | Ramsey     |                       |                  | Prisma Health - Upstate | Greenville, SC                           | Co-Investigator                                         | Aqueous-PREP and PREPARE                                                                   |
| Alex                              | Burnikel   |                       |                  | Prisma Health - Upstate | Greenville, SC                           | Co-Investigator                                         | Aqueous-PREP and PREPARE                                                                   |
| Michael                           | Colello    |                       |                  | Prisma Health - Upstate | Greenville, SC                           | Co-Investigator                                         | Aqueous-PREP and PREPARE                                                                   |
| Russel                            | Stewart    |                       |                  | Prisma Health - Upstate | Greenville, SC                           | Co-Investigator                                         | Aqueous-PREP and PREPARE                                                                   |
| Jeremy                            | Wise       |                       |                  | Prisma Health - Upstate | Greenville, SC                           | Co-Investigator                                         | Aqueous-PREP and PREPARE                                                                   |
| M. Christian                      | Moody      |                       |                  | Prisma Health - Upstate | Greenville, SC                           | Co-Investigator                                         | Aqueous-PREP and PREPARE                                                                   |
| Matthew                           | Anderson   |                       |                  | Prisma Health - Upstate | Greenville, SC                           | Co-Investigator                                         | Aqueous-PREP and PREPARE                                                                   |
| Joshua                            | Eskew      |                       |                  | Prisma Health - Upstate | Greenville, SC                           | Co-Investigator                                         | Aqueous-PREP and PREPARE                                                                   |
| Benjamin                          | Judkins    |                       |                  | Prisma Health - Upstate | Greenville, SC                           | Co-Investigator                                         | Aqueous-PREP and PREPARE                                                                   |
| James M.                          | Miller     |                       |                  | Prisma Health - Upstate | Greenville, SC                           | Co-Investigator                                         | Aqueous-PREP and PREPARE                                                                   |
| Stephanie L.                      | Tanner     |                       |                  | Prisma Health - Upstate | Greenville, SC                           | Research Coordinator                                    | Aqueous-PREP and PREPARE                                                                   |
| Rebecca G.                        | Snider     |                       |                  | Prisma Health - Upstate | Greenville, SC                           | Research Coordinator                                    | Aqueous-PREP and PREPARE                                                                   |
| Christine E.                      | Townsend   |                       |                  | Prisma Health - Upstate | Greenville, SC                           | Research Coordinator                                    | Aqueous-PREP and PREPARE                                                                   |
| Kayla H.                          | Pham       |                       |                  | Prisma Health - Upstate | Greenville, SC                           | Research Coordinator                                    | Aqueous-PREP and PREPARE                                                                   |
| Abigail                           | Martin     |                       |                  | Prisma Health - Upstate | Greenville, SC                           | Research Coordinator                                    | Aqueous-PREP and PREPARE                                                                   |
| Emily                             | Robertson  |                       |                  | Prisma Health - Upstate | Greenville, SC                           | Research Coordinator                                    | Aqueous-PREP and PREPARE                                                                   |

## Supplemental Online Content: Nonauthor Collaborators

\*Indicates required information. Only first name, last name, and suffix will appear in PubMed.

| *First Name and Middle Initial(s) | *Last Name        | *Suffix (eg, Jr, III) | Academic Degrees | Institution                             | Location (city, state/province, country) | Role or Contribution, eg, chair, principal investigator | Group (if more than 1 Group listed in the byline) and/or Subgroup (eg, Steering Committee) |
|-----------------------------------|-------------------|-----------------------|------------------|-----------------------------------------|------------------------------------------|---------------------------------------------------------|--------------------------------------------------------------------------------------------|
| John Wilson                       | Skyes             |                       |                  | Prisma Health - Upstate                 | Greenville, SC                           | Research Coordinator                                    | Aqueous-PREP and PREPARE                                                                   |
| Saam                              | Morshed           |                       |                  | University of California, San Francisco | San Francisco, CA                        | Local Principal Investigator                            | Aqueous-PREP and PREPARE                                                                   |
| Utku                              | Kandemir          |                       |                  | University of California, San Francisco | San Francisco, CA                        | Co-Investigator                                         | Aqueous-PREP and PREPARE                                                                   |
| Meir                              | Marmor            |                       |                  | University of California, San Francisco | San Francisco, CA                        | Local Principal Investigator                            | Aqueous-PREP and PREPARE                                                                   |
| Amir                              | Matityahu         |                       |                  | University of California, San Francisco | San Francisco, CA                        | Co-Investigator                                         | Aqueous-PREP and PREPARE                                                                   |
| R. Trigg                          | McClellan         |                       |                  | University of California, San Francisco | San Francisco, CA                        | Co-Investigator                                         | Aqueous-PREP and PREPARE                                                                   |
| Eric                              | Meinberg          |                       |                  | University of California, San Francisco | San Francisco, CA                        | Co-Investigator                                         | Aqueous-PREP and PREPARE                                                                   |
| Theodore                          | Miclau            |                       |                  | University of California, San Francisco | San Francisco, CA                        | Co-Investigator                                         | Aqueous-PREP and PREPARE                                                                   |
| David                             | Shearer           |                       |                  | University of California, San Francisco | San Francisco, CA                        | Co-Investigator                                         | Aqueous-PREP and PREPARE                                                                   |
| Paul                              | Toogood           |                       |                  | University of California, San Francisco | San Francisco, CA                        | Co-Investigator                                         | Aqueous-PREP and PREPARE                                                                   |
| Anthony                           | Ding              |                       |                  | University of California, San Francisco | San Francisco, CA                        | Co-Investigator                                         | Aqueous-PREP and PREPARE                                                                   |
| Erin                              | Donohue           |                       |                  | University of California, San Francisco | San Francisco, CA                        | Co-Investigator                                         | Aqueous-PREP and PREPARE                                                                   |
| Jothi                             | Murali            |                       |                  | University of California, San Francisco | San Francisco, CA                        | Co-Investigator                                         | Aqueous-PREP and PREPARE                                                                   |
| Ashraf                            | El Naga           |                       |                  | University of California, San Francisco | San Francisco, CA                        | Co-Investigator                                         | Aqueous-PREP and PREPARE                                                                   |
| Jennifer                          | Tangtiphaibontana |                       |                  | University of California, San Francisco | San Francisco, CA                        | Co-Investigator                                         | Aqueous-PREP and PREPARE                                                                   |
| Tigist                            | Belaye            |                       |                  | University of California, San Francisco | San Francisco, CA                        | Research Coordinator                                    | Aqueous-PREP and PREPARE                                                                   |

## Supplemental Online Content: Nonauthor Collaborators

\*Indicates required information. Only first name, last name, and suffix will appear in PubMed.

| *First Name and Middle Initial(s) | *Last Name    | *Suffix (eg, Jr, III) | Academic Degrees | Institution                                 | Location (city, state/province, country) | Role or Contribution, eg, chair, principal investigator | Group (if more than 1 Group listed in the byline) and/or Subgroup (eg, Steering Committee) |
|-----------------------------------|---------------|-----------------------|------------------|---------------------------------------------|------------------------------------------|---------------------------------------------------------|--------------------------------------------------------------------------------------------|
| Eleni                             | Berhaneselase |                       |                  | University of California, San Francisco     | San Francisco, CA                        | Research Coordinator                                    | Aqueous-PREP and PREPARE                                                                   |
| Alexandra                         | Paul          |                       |                  | University of California, San Francisco     | San Francisco, CA                        | Research Coordinator                                    | Aqueous-PREP and PREPARE                                                                   |
| Kartik                            | Garg          |                       |                  | University of California, San Francisco     | San Francisco, CA                        | Research Coordinator                                    | Aqueous-PREP and PREPARE                                                                   |
| Dimitry                           | Pokhvashev    |                       |                  | University of California, San Francisco     | San Francisco, CA                        | Research Coordinator                                    | Aqueous-PREP and PREPARE                                                                   |
| Joshua L.                         | Gary          |                       |                  | McGovern Medical School at UTHealth Houston | Houston, TX                              | Local Principal Investigator                            | Aqueous-PREP                                                                               |
| Stephanie J.                      | Warner        |                       |                  | McGovern Medical School at UTHealth Houston | Houston, TX                              | Co-Investigator                                         | Aqueous-PREP                                                                               |
| John W.                           | Munz          |                       |                  | McGovern Medical School at UTHealth Houston | Houston, TX                              | Co-Investigator                                         | Aqueous-PREP                                                                               |
| Andrew M.                         | Choo          |                       |                  | McGovern Medical School at UTHealth Houston | Houston, TX                              | Co-Investigator                                         | Aqueous-PREP                                                                               |
| Timothy S.                        | Schor         |                       |                  | McGovern Medical School at UTHealth Houston | Houston, TX                              | Co-Investigator                                         | Aqueous-PREP                                                                               |
| Milton L. "Chip"                  | Routt         |                       |                  | McGovern Medical School at UTHealth Houston | Houston, TX                              | Co-Investigator                                         | Aqueous-PREP                                                                               |
| Mayank                            | Rao           |                       |                  | McGovern Medical School at UTHealth Houston | Houston, TX                              | Research Coordinator                                    | Aqueous-PREP                                                                               |
| Guillermo                         | Pechero       |                       |                  | McGovern Medical School at UTHealth Houston | Houston, TX                              | Research Coordinator                                    | Aqueous-PREP                                                                               |
| Adam                              | Miller        |                       |                  | McGovern Medical School at UTHealth Houston | Houston, TX                              | Research Coordinator                                    | Aqueous-PREP                                                                               |
| Michael                           | Kutzler       |                       |                  | McGovern Medical School at UTHealth Houston | Houston, TX                              | Research Coordinator                                    | Aqueous-PREP                                                                               |
| Jennifer E.                       | Hagen         |                       |                  | University of Florida                       | Gainesville, FL                          | Local Principal Investigator                            | Aqueous-PREP                                                                               |
| Matthew                           | Patrick       |                       |                  | University of Florida                       | Gainesville, FL                          | Co-Investigator                                         | Aqueous-PREP                                                                               |
| Richard                           | Vlasak        |                       |                  | University of Florida                       | Gainesville, FL                          | Co-Investigator                                         | Aqueous-PREP                                                                               |

## Supplemental Online Content: Nonauthor Collaborators

\*Indicates required information. Only first name, last name, and suffix will appear in PubMed.

| *First Name and Middle Initial(s) | *Last Name | *Suffix (eg, Jr, III) | Academic Degrees | Institution               | Location (city, state/province, country) | Role or Contribution, eg, chair, principal investigator | Group (if more than 1 Group listed in the byline) and/or Subgroup (eg, Steering Committee) |
|-----------------------------------|------------|-----------------------|------------------|---------------------------|------------------------------------------|---------------------------------------------------------|--------------------------------------------------------------------------------------------|
| Thomas                            | Krupko     |                       |                  | University of Florida     | Gainesville, FL                          | Co-Investigator                                         | Aqueous-PREP                                                                               |
| Kalia                             | Sadasivan  |                       |                  | University of Florida     | Gainesville, FL                          | Co-Investigator                                         | Aqueous-PREP                                                                               |
| Michael                           | Talerico   |                       |                  | University of Florida     | Gainesville, FL                          | Co-Investigator                                         | Aqueous-PREP                                                                               |
| Marybeth                          | Horodyski  |                       |                  | University of Florida     | Gainesville, FL                          | Co-Investigator                                         | Aqueous-PREP                                                                               |
| Chris                             | Koenig     |                       |                  | University of Florida     | Gainesville, FL                          | Research Coordinator                                    | Aqueous-PREP                                                                               |
| Daniel                            | Bailey     |                       |                  | University of Florida     | Gainesville, FL                          | Research Coordinator                                    | Aqueous-PREP                                                                               |
| Daniel                            | Wentworth  |                       |                  | University of Florida     | Gainesville, FL                          | Research Coordinator                                    | Aqueous-PREP                                                                               |
| Chi                               | Van        |                       |                  | University of Florida     | Gainesville, FL                          | Research Coordinator                                    | Aqueous-PREP                                                                               |
| Justin                            | Schwartz   |                       |                  | University of Florida     | Gainesville, FL                          | Research Coordinator                                    | Aqueous-PREP                                                                               |
| Marissa                           | Pazik      |                       |                  | University of Florida     | Gainesville, FL                          | Research Coordinator                                    | Aqueous-PREP                                                                               |
| Niloofar                          | Dehghan    |                       |                  | University of Florida     | Gainesville, FL                          | Local Principal Investigator                            | Aqueous-PREP                                                                               |
| Clifford B.                       | Jones      |                       |                  | The CORE Institute        | Phoenix, AZ                              | Local Principal Investigator                            | Aqueous-PREP                                                                               |
| J. Tracy                          | Watson     |                       |                  | The CORE Institute        | Phoenix, AZ                              | Co-Investigator                                         | Aqueous-PREP                                                                               |
| Michael                           | McKee      |                       |                  | The CORE Institute        | Phoenix, AZ                              | Co-Investigator                                         | Aqueous-PREP                                                                               |
| Ammar                             | Karim      |                       |                  | The CORE Institute        | Phoenix, AZ                              | Co-Investigator                                         | Aqueous-PREP                                                                               |
| Michael                           | Talerico   |                       |                  | The CORE Institute        | Phoenix, AZ                              | Co-Investigator                                         | Aqueous-PREP                                                                               |
| Debra L.                          | Sietsema   |                       |                  | The CORE Institute        | Phoenix, AZ                              | Research Coordinator                                    | Aqueous-PREP                                                                               |
| Alyse                             | Williams   |                       |                  | The CORE Institute        | Phoenix, AZ                              | Research Coordinator                                    | Aqueous-PREP                                                                               |
| Taylor                            | Dykes      |                       |                  | The CORE Institute        | Phoenix, AZ                              | Research Coordinator                                    | Aqueous-PREP                                                                               |
| William T.                        | Obremsky   |                       |                  | Vanderbilt Medical Center | Nashville, TN                            | Local Principal Investigator                            | Aqueous-PREP                                                                               |
| Amir A.                           | Jahangir   |                       |                  | Vanderbilt Medical Center | Nashville, TN                            | Co-Investigator                                         | Aqueous-PREP                                                                               |
| Manish                            | Sethi      |                       |                  | Vanderbilt Medical Center | Nashville, TN                            | Co-Investigator                                         | Aqueous-PREP                                                                               |
| Robert                            | Boyce      |                       |                  | Vanderbilt Medical Center | Nashville, TN                            | Co-Investigator                                         | Aqueous-PREP                                                                               |
| Philip                            | Mitchell   |                       |                  | Vanderbilt Medical Center | Nashville, TN                            | Co-Investigator                                         | Aqueous-PREP                                                                               |
| Daniel J.                         | Stinner    |                       |                  | Vanderbilt Medical Center | Nashville, TN                            | Co-Investigator                                         | Aqueous-PREP                                                                               |
| Karen                             | Trochez    |                       |                  | Vanderbilt Medical Center | Nashville, TN                            | Research Coordinator                                    | Aqueous-PREP                                                                               |
| Andres                            | Rodriguez  |                       |                  | Vanderbilt Medical Center | Nashville, TN                            | Research Coordinator                                    | Aqueous-PREP                                                                               |
| Vamshi                            | Gajari     |                       |                  | Vanderbilt Medical Center | Nashville, TN                            | Research Coordinator                                    | Aqueous-PREP                                                                               |
| Elsa                              | Rodriguez  |                       |                  | Vanderbilt Medical Center | Nashville, TN                            | Research Coordinator                                    | Aqueous-PREP                                                                               |



## Supplemental Online Content: Nonauthor Collaborators

\*Indicates required information. Only first name, last name, and suffix will appear in PubMed.

| *First Name and Middle Initial(s) | *Last Name  | *Suffix (eg, Jr, III) | Academic Degrees | Institution                               | Location (city, state/province, country) | Role or Contribution, eg, chair, principal investigator | Group (if more than 1 Group listed in the byline) and/or Subgroup (eg, Steering Committee) |
|-----------------------------------|-------------|-----------------------|------------------|-------------------------------------------|------------------------------------------|---------------------------------------------------------|--------------------------------------------------------------------------------------------|
| Charles                           | Pritchett   |                       |                  | Vanderbilt Medical Center                 | Nashville, TN                            | Research Coordinator                                    | Aqueous-PREP                                                                               |
| Natalie                           | Hogan       |                       |                  | Vanderbilt Medical Center                 | Nashville, TN                            | Research Coordinator                                    | Aqueous-PREP                                                                               |
| A. Fidel                          | Moreno      |                       |                  | Vanderbilt Medical Center                 | Nashville, TN                            | Research Coordinator                                    | Aqueous-PREP                                                                               |
| Christina                         | Boulton     |                       |                  | Banner University Medical Center – Tucson | Tucson, AZ                               | Local Principal Investigator                            | Aqueous-PREP                                                                               |
| Jason                             | Lowe        |                       |                  | Banner University Medical Center – Tucson | Tucson, AZ                               | Co-Investigator                                         | Aqueous-PREP                                                                               |
| Jason                             | Wild        |                       |                  | Banner University Medical Center – Tucson | Tucson, AZ                               | Co-Investigator                                         | Aqueous-PREP                                                                               |
| John T.                           | Ruth        |                       |                  | Banner University Medical Center – Tucson | Tucson, AZ                               | Co-Investigator                                         | Aqueous-PREP                                                                               |
| Michel                            | Taylor      |                       |                  | Banner University Medical Center – Tucson | Tucson, AZ                               | Co-Investigator                                         | Aqueous-PREP                                                                               |
| Brad                              | Askam       |                       |                  | Banner University Medical Center – Tucson | Tucson, AZ                               | Co-Investigator                                         | Aqueous-PREP                                                                               |
| Andrea                            | Seach       |                       |                  | Banner University Medical Center – Tucson | Tucson, AZ                               | Manager                                                 | Aqueous-PREP                                                                               |
| Sabina                            | Saeed       |                       |                  | Banner University Medical Center – Tucson | Tucson, AZ                               | Research Coordinator                                    | Aqueous-PREP                                                                               |
| Hunter                            | Culbert     |                       |                  | Banner University Medical Center – Tucson | Tucson, AZ                               | Research Coordinator                                    | Aqueous-PREP                                                                               |
| Alejandro                         | Cruz        |                       |                  | Banner University Medical Center – Tucson | Tucson, AZ                               | Research Coordinator                                    | Aqueous-PREP                                                                               |
| Thomas                            | Knapp       |                       |                  | Banner University Medical Center – Tucson | Tucson, AZ                               | Research Coordinator                                    | Aqueous-PREP                                                                               |
| Colin                             | Hurkett     |                       |                  | Banner University Medical Center – Tucson | Tucson, AZ                               | Research Coordinator                                    | Aqueous-PREP                                                                               |
| Maya                              | Lowney      |                       |                  | Banner University Medical Center – Tucson | Tucson, AZ                               | Research Coordinator                                    | Aqueous-PREP                                                                               |
| Breanna                           | Featherston |                       |                  | Banner University Medical Center – Tucson | Tucson, AZ                               | Research Coordinator                                    | Aqueous-PREP                                                                               |

## Supplemental Online Content: Nonauthor Collaborators

\*Indicates required information. Only first name, last name, and suffix will appear in PubMed.

| *First Name and Middle Initial(s) | *Last Name        | *Suffix (eg, Jr, III) | Academic Degrees | Institution                      | Location (city, state/province, country) | Role or Contribution, eg, chair, principal investigator | Group (if more than 1 Group listed in the byline) and/or Subgroup (eg, Steering Committee) |
|-----------------------------------|-------------------|-----------------------|------------------|----------------------------------|------------------------------------------|---------------------------------------------------------|--------------------------------------------------------------------------------------------|
| Michael                           | Prayson           |                       |                  | Wright State University          | Dayton, OH                               | Local Principal Investigator                            | Aqueous-PREP                                                                               |
| Indresh                           | Venkatarayappa    |                       |                  | Wright State University          | Dayton, OH                               | Co-Investigator                                         | Aqueous-PREP                                                                               |
| Brandon                           | Horne             |                       |                  | Wright State University          | Dayton, OH                               | Co-Investigator                                         | Aqueous-PREP                                                                               |
| Jennifer                          | Jerele            |                       |                  | Wright State University          | Dayton, OH                               | Co-Investigator                                         | Aqueous-PREP                                                                               |
| Linda                             | Clark             |                       |                  | Wright State University          | Dayton, OH                               | Research Coordinator                                    | Aqueous-PREP                                                                               |
| Francesc                          | Marcano-Fernández |                       |                  | Hospital Universitari Parc Tauli | Barcelona, Spain                         | Local Principal Investigator                            | Aqueous-PREP                                                                               |
| Montserrat                        | Jornet-Gibert     |                       |                  | Hospital Universitari Parc Tauli | Barcelona, Spain                         | Co-Investigator                                         | Aqueous-PREP                                                                               |
| Laia                              | Martinez-Carreres |                       |                  | Hospital Universitari Parc Tauli | Barcelona, Spain                         | Research Coordinator                                    | Aqueous-PREP                                                                               |
| David                             | Marti-Garin       |                       |                  | Hospital Universitari Parc Tauli | Barcelona, Spain                         | Research Coordinator                                    | Aqueous-PREP                                                                               |
| Jorge                             | Serrano-Sanz      |                       |                  | Hospital Universitari Parc Tauli | Barcelona, Spain                         | Research Coordinator                                    | Aqueous-PREP                                                                               |
| Joel                              | Sanchez-Fernandez |                       |                  | Hospital Universitari Parc Tauli | Barcelona, Spain                         | Research Coordinator                                    | Aqueous-PREP                                                                               |
| Matsuyama                         | Sanz-Molero       |                       |                  | Hospital Universitari Parc Tauli | Barcelona, Spain                         | Research Coordinator                                    | Aqueous-PREP                                                                               |
| Alejandro                         | Carballo          |                       |                  | Hospital Universitari Parc Tauli | Barcelona, Spain                         | Research Coordinator                                    | Aqueous-PREP                                                                               |
| Xavier                            | Pelfort           |                       |                  | Hospital Universitari Parc Tauli | Barcelona, Spain                         | Research Coordinator                                    | Aqueous-PREP                                                                               |
| Francesc                          | Acerboni-Flores   |                       |                  | Hospital Universitari Parc Tauli | Barcelona, Spain                         | Research Coordinator                                    | Aqueous-PREP                                                                               |
| Anna                              | Alavedra-Massana  |                       |                  | Hospital Universitari Parc Tauli | Barcelona, Spain                         | Research Coordinator                                    | Aqueous-PREP                                                                               |
| Neus                              | Anglada-Torres    |                       |                  | Hospital Universitari Parc Tauli | Barcelona, Spain                         | Research Coordinator                                    | Aqueous-PREP                                                                               |
| Alexandre                         | Berenguer         |                       |                  | Hospital Universitari Parc Tauli | Barcelona, Spain                         | Research Coordinator                                    | Aqueous-PREP                                                                               |
| Jaume                             | Camara-Cabrera    |                       |                  | Hospital Universitari Parc Tauli | Barcelona, Spain                         | Research Coordinator                                    | Aqueous-PREP                                                                               |
| Ariadna                           | Caparros-Garcia   |                       |                  | Hospital Universitari Parc Tauli | Barcelona, Spain                         | Research Coordinator                                    | Aqueous-PREP                                                                               |
| Ferran                            | Fillat-Goma       |                       |                  | Hospital Universitari Parc Tauli | Barcelona, Spain                         | Research Coordinator                                    | Aqueous-PREP                                                                               |
| Ruben                             | Fuentes-Lopez     |                       |                  | Hospital Universitari Parc Tauli | Barcelona, Spain                         | Research Coordinator                                    | Aqueous-PREP                                                                               |
| Ramona                            | Garcia-Rodriguez  |                       |                  | Hospital Universitari Parc Tauli | Barcelona, Spain                         | Research Coordinator                                    | Aqueous-PREP                                                                               |
| Nuria                             | Gimeno-Calavia    |                       |                  | Hospital Universitari Parc Tauli | Barcelona, Spain                         | Research Coordinator                                    | Aqueous-PREP                                                                               |
| Guillem                           | Graells-Alonso    |                       |                  | Hospital Universitari Parc Tauli | Barcelona, Spain                         | Research Coordinator                                    | Aqueous-PREP                                                                               |
| Marta                             | Martinez-Alvarez  |                       |                  | Hospital Universitari Parc Tauli | Barcelona, Spain                         | Research Coordinator                                    | Aqueous-PREP                                                                               |

## Supplemental Online Content: Nonauthor Collaborators

\*Indicates required information. Only first name, last name, and suffix will appear in PubMed.

| *First Name and Middle Initial(s) | *Last Name            | *Suffix (eg, Jr, III) | Academic Degrees | Institution                       | Location (city, state/province, country) | Role or Contribution, eg, chair, principal investigator | Group (if more than 1 Group listed in the byline) and/or Subgroup (eg, Steering Committee) |
|-----------------------------------|-----------------------|-----------------------|------------------|-----------------------------------|------------------------------------------|---------------------------------------------------------|--------------------------------------------------------------------------------------------|
| Patricia                          | Martinez-Grau         |                       |                  | Hospital Universitari Parc Tauli  | Barcelona, Spain                         | Research Coordinator                                    | Aqueous-PREP                                                                               |
| Raul                              | Pellejero-Garcia      |                       |                  | Hospital Universitari Parc Tauli  | Barcelona, Spain                         | Research Coordinator                                    | Aqueous-PREP                                                                               |
| Ona                               | Rafols-Perramon       |                       |                  | Hospital Universitari Parc Tauli  | Barcelona, Spain                         | Research Coordinator                                    | Aqueous-PREP                                                                               |
| Juan Manuel                       | Penalver              |                       |                  | Hospital Universitari Parc Tauli  | Barcelona, Spain                         | Research Coordinator                                    | Aqueous-PREP                                                                               |
| Monica Salomo                     | Domenech              |                       |                  | Hospital Universitari Parc Tauli  | Barcelona, Spain                         | Research Coordinator                                    | Aqueous-PREP                                                                               |
| Albert                            | Soler-Cano            |                       |                  | Hospital Universitari Parc Tauli  | Barcelona, Spain                         | Research Coordinator                                    | Aqueous-PREP                                                                               |
| Aldo                              | Velasco-Barrera       |                       |                  | Hospital Universitari Parc Tauli  | Barcelona, Spain                         | Research Coordinator                                    | Aqueous-PREP                                                                               |
| Christian                         | Yela-Verdú            |                       |                  | Hospital Universitari Parc Tauli  | Barcelona, Spain                         | Research Coordinator                                    | Aqueous-PREP                                                                               |
| Mercedes                          | Bueno-Ruiz            |                       |                  | Hospital Universitari Parc Tauli  | Barcelona, Spain                         | Research Coordinator                                    | Aqueous-PREP                                                                               |
| Estrella                          | Sánchez-Palomino      |                       |                  | Hospital Universitari Parc Tauli  | Barcelona, Spain                         | Research Coordinator                                    | Aqueous-PREP                                                                               |
| Vito                              | Andriola              |                       |                  | Hospital Universitari Parc Tauli  | Barcelona, Spain                         | Research Coordinator                                    | Aqueous-PREP                                                                               |
| Matilde                           | Molina-Corbacho       |                       |                  | Hospital Universitari Parc Tauli  | Barcelona, Spain                         | Research Coordinator                                    | Aqueous-PREP                                                                               |
| Yeray                             | Maldonado-Sotoca      |                       |                  | Hospital Universitari Parc Tauli  | Barcelona, Spain                         | Research Coordinator                                    | Aqueous-PREP                                                                               |
| Alfons                            | Gasset-Teixidor       |                       |                  | Hospital Universitari Parc Tauli  | Barcelona, Spain                         | Research Coordinator                                    | Aqueous-PREP                                                                               |
| Jorge                             | Blasco-Moreu          |                       |                  | Hospital Universitari Parc Tauli  | Barcelona, Spain                         | Research Coordinator                                    | Aqueous-PREP                                                                               |
| Núria                             | Fernández-Poch        |                       |                  | Hospital Universitari Parc Tauli  | Barcelona, Spain                         | Research Coordinator                                    | Aqueous-PREP                                                                               |
| Josep                             | Rodoreda-Puigdemasa   |                       |                  | Hospital Universitari Parc Tauli  | Barcelona, Spain                         | Research Coordinator                                    | Aqueous-PREP                                                                               |
| Arnau                             | Verdaguer-Figuerola   |                       |                  | Hospital Universitari Parc Tauli  | Barcelona, Spain                         | Research Coordinator                                    | Aqueous-PREP                                                                               |
| Heber                             | Enrique Cueva-Sevieri |                       |                  | Hospital Universitari Parc Tauli  | Barcelona, Spain                         | Research Coordinator                                    | Aqueous-PREP                                                                               |
| Santiago                          | Garcia-Gimenez        |                       |                  | Hospital Universitari Parc Tauli  | Barcelona, Spain                         | Research Coordinator                                    | Aqueous-PREP                                                                               |
| Ernesto                           | Guerra-Farfan         |                       |                  | Vall d'Hebron University Hospital | Barcelona, Spain                         | Local Principal Investigator                            | Aqueous-PREP                                                                               |
| Jordi                             | Tomas-Hernandez       |                       |                  | Vall d'Hebron University Hospital | Barcelona, Spain                         | Research Coordinator                                    | Aqueous-PREP                                                                               |
| Jordi                             | Teixidor-Serra        |                       |                  | Vall d'Hebron University Hospital | Barcelona, Spain                         | Research Coordinator                                    | Aqueous-PREP                                                                               |

## Supplemental Online Content: Nonauthor Collaborators

\*Indicates required information. Only first name, last name, and suffix will appear in PubMed.

| *First Name and Middle Initial(s) | *Last Name             | *Suffix (eg, Jr, III) | Academic Degrees | Institution                                      | Location (city, state/province, country) | Role or Contribution, eg, chair, principal investigator | Group (if more than 1 Group listed in the byline) and/or Subgroup (eg, Steering Committee) |
|-----------------------------------|------------------------|-----------------------|------------------|--------------------------------------------------|------------------------------------------|---------------------------------------------------------|--------------------------------------------------------------------------------------------|
| Vicente                           | Molero-Garcia          |                       |                  | Vall d'Hebron University Hospital                | Barcelona, Spain                         | Research Coordinator                                    | Aqueous-PREP                                                                               |
| Jordi                             | Selga-Marsa            |                       |                  | Vall d'Hebron University Hospital                | Barcelona, Spain                         | Research Coordinator                                    | Aqueous-PREP                                                                               |
| Juan                              | Antonio Porcel-Vasquez |                       |                  | Vall d'Hebron University Hospital                | Barcelona, Spain                         | Research Coordinator                                    | Aqueous-PREP                                                                               |
| Jose                              | Vicente Andres-Peiro   |                       |                  | Vall d'Hebron University Hospital                | Barcelona, Spain                         | Research Coordinator                                    | Aqueous-PREP                                                                               |
| Joan                              | Minguell-Monyart       |                       |                  | Vall d'Hebron University Hospital                | Barcelona, Spain                         | Research Coordinator                                    | Aqueous-PREP                                                                               |
| Jorge                             | Nuñez-Camarena         |                       |                  | Vall d'Hebron University Hospital                | Barcelona, Spain                         | Research Coordinator                                    | Aqueous-PREP                                                                               |
| Maria                             | del Mar Villar-Casares |                       |                  | Vall d'Hebron University Hospital                | Barcelona, Spain                         | Research Coordinator                                    | Aqueous-PREP                                                                               |
| Jaume                             | Mestre-Torres          |                       |                  | Vall d'Hebron University Hospital                | Barcelona, Spain                         | Research Coordinator                                    | Aqueous-PREP                                                                               |
| Pilar                             | Laluzza-Broto          |                       |                  | Vall d'Hebron University Hospital                | Barcelona, Spain                         | Research Coordinator                                    | Aqueous-PREP                                                                               |
| Felipe                            | Moreira-Borim          |                       |                  | Vall d'Hebron University Hospital                | Barcelona, Spain                         | Research Coordinator                                    | Aqueous-PREP                                                                               |
| Yaiza                             | Garcia-Sanchez         |                       |                  | Vall d'Hebron University Hospital                | Barcelona, Spain                         | Research Coordinator                                    | Aqueous-PREP                                                                               |
| Nicholas M.                       | Romeo                  |                       |                  | MetroHealth Medical Center                       | Cleveland, OH                            | Local Principal Investigator                            | PREPARE                                                                                    |
| Heather A.                        | Vallier                |                       |                  | MetroHealth Medical Center                       | Cleveland, OH                            | Co-Investigator                                         | PREPARE                                                                                    |
| Mary A.                           | Breslin                |                       |                  | MetroHealth Medical Center                       | Cleveland, OH                            | Research Coordinator                                    | PREPARE                                                                                    |
| Joanne                            | Fraifogl               |                       |                  | MetroHealth Medical Center                       | Cleveland, OH                            | Research Assistant                                      | PREPARE                                                                                    |
| Eleanor S.                        | Wilson                 |                       |                  | MetroHealth Medical Center                       | Cleveland, OH                            | Research Assistant                                      | PREPARE                                                                                    |
| Leanne K.                         | Wadenpfuhl             |                       |                  | MetroHealth Medical Center                       | Cleveland, OH                            | Research Assistant                                      | PREPARE                                                                                    |
| Paul G.                           | Halliday               |                       |                  | MetroHealth Medical Center                       | Cleveland, OH                            | Research Assistant                                      | PREPARE                                                                                    |
| Isabella                          | Heimke                 |                       |                  | MetroHealth Medical Center                       | Cleveland, OH                            | Research Assistant                                      | PREPARE                                                                                    |
| Darius G.                         | Viskontas              |                       |                  | FRASER HEALTH AUTHORITY/Royal Columbian Hospital | New Westminster, BC                      | Local Principal Investigator                            | PREPARE                                                                                    |
| Kelly L.                          | Apostle                |                       |                  | FRASER HEALTH AUTHORITY/Royal Columbian Hospital | New Westminster, BC                      | Co-Investigator                                         | PREPARE                                                                                    |

## Supplemental Online Content: Nonauthor Collaborators

\*Indicates required information. Only first name, last name, and suffix will appear in PubMed.

| *First Name and Middle Initial(s) | *Last Name | *Suffix (eg, Jr, III) | Academic Degrees | Institution                                                       | Location (city, state/province, country) | Role or Contribution, eg, chair, principal investigator | Group (if more than 1 Group listed in the byline) and/or Subgroup (eg, Steering Committee) |
|-----------------------------------|------------|-----------------------|------------------|-------------------------------------------------------------------|------------------------------------------|---------------------------------------------------------|--------------------------------------------------------------------------------------------|
| Dory S.                           | Boyer      |                       |                  | FRASER HEALTH AUTHORITY/Royal Columbian Hospital                  | New Westminster, BC                      | Co-Investigator                                         | PREPARE                                                                                    |
| Farhas O.                         | Moola      |                       |                  | FRASER HEALTH AUTHORITY/Royal Columbian Hospital                  | New Westminster, BC                      | Co-Investigator                                         | PREPARE                                                                                    |
| Bertrand H.                       | Perey      |                       |                  | FRASER HEALTH AUTHORITY/Royal Columbian Hospital                  | New Westminster, BC                      | Co-Investigator                                         | PREPARE                                                                                    |
| Trevor B.                         | Stone      |                       |                  | FRASER HEALTH AUTHORITY/Royal Columbian Hospital                  | New Westminster, BC                      | Co-Investigator                                         | PREPARE                                                                                    |
| H. Michael                        | Lemke      |                       |                  | FRASER HEALTH AUTHORITY/Royal Columbian Hospital                  | New Westminster, BC                      | Co-Investigator                                         | PREPARE                                                                                    |
| Mauri                             | Zomar      |                       |                  | FRASER HEALTH AUTHORITY/Royal Columbian Hospital                  | New Westminster, BC                      | Research Coordinator                                    | PREPARE                                                                                    |
| Ella                              | Spicer     |                       |                  | FRASER HEALTH AUTHORITY/Royal Columbian Hospital                  | New Westminster, BC                      | Research Coordinator                                    | PREPARE                                                                                    |
| Chen "Brenda"                     | Fan        |                       |                  | FRASER HEALTH AUTHORITY/Royal Columbian Hospital                  | New Westminster, BC                      | Research Assistant                                      | PREPARE                                                                                    |
| Krysten                           | Payne      |                       |                  | FRASER HEALTH AUTHORITY/Royal Columbian Hospital                  | New Westminster, BC                      | Research Assistant                                      | PREPARE                                                                                    |
| Kevin                             | Phelps     |                       |                  | Carolinas Medical Center, Atrium Health Musculoskeletal Institute | Charlotte, NC                            | Local Principal Investigator                            | PREPARE                                                                                    |

Supplemental Online Content: Nonauthor Collaborators

\*Indicates required information. Only first name, last name, and suffix will appear in PubMed.

| *First Name and Middle Initial(s) | *Last Name | *Suffix (eg, Jr, III) | Academic Degrees | Institution                                                       | Location (city, state/province, country) | Role or Contribution, eg, chair, principal investigator | Group (if more than 1 Group listed in the byline) and/or Subgroup (eg, Steering Committee) |
|-----------------------------------|------------|-----------------------|------------------|-------------------------------------------------------------------|------------------------------------------|---------------------------------------------------------|--------------------------------------------------------------------------------------------|
| Michael                           | Bosse      |                       |                  | Carolinas Medical Center, Atrium Health Musculoskeletal Institute | Charlotte, NC                            | Co-Investigator                                         | PREPARE                                                                                    |
| Madhav                            | Karunakar  |                       |                  | Carolinas Medical Center, Atrium Health Musculoskeletal Institute | Charlotte, NC                            | Co-Investigator                                         | PREPARE                                                                                    |
| Laurence                          | Kempton    |                       |                  | Carolinas Medical Center, Atrium Health Musculoskeletal Institute | Charlotte, NC                            | Co-Investigator                                         | PREPARE                                                                                    |
| Stephen                           | Sims       |                       |                  | Carolinas Medical Center, Atrium Health Musculoskeletal Institute | Charlotte, NC                            | Co-Investigator                                         | PREPARE                                                                                    |
| Joseph                            | Hsu        |                       |                  | Carolinas Medical Center, Atrium Health Musculoskeletal Institute | Charlotte, NC                            | Co-Investigator                                         | PREPARE                                                                                    |
| Rachel                            | Seymour    |                       |                  | Carolinas Medical Center, Atrium Health Musculoskeletal Institute | Charlotte, NC                            | Manager                                                 | PREPARE                                                                                    |
| Christine                         | Churchill  |                       |                  | Carolinas Medical Center, Atrium Health Musculoskeletal Institute | Charlotte, NC                            | Research Coordinator                                    | PREPARE                                                                                    |
| Claire                            | Bartel     |                       |                  | Carolinas Medical Center, Atrium Health Musculoskeletal Institute | Charlotte, NC                            | Research Assistant                                      | PREPARE                                                                                    |
| Robert Miles                      | Mayberry   |                       |                  | Carolinas Medical Center, Atrium Health Musculoskeletal Institute | Charlotte, NC                            | Research Assistant                                      | PREPARE                                                                                    |
| Maggie                            | Brownrigg  |                       |                  | Carolinas Medical Center, Atrium Health Musculoskeletal Institute | Charlotte, NC                            | Research Assistant                                      | PREPARE                                                                                    |

## Supplemental Online Content: Nonauthor Collaborators

\*Indicates required information. Only first name, last name, and suffix will appear in PubMed.

| *First Name and Middle Initial(s) | *Last Name   | *Suffix (eg, Jr, III) | Academic Degrees | Institution                                                       | Location (city, state/province, country) | Role or Contribution, eg, chair, principal investigator | Group (if more than 1 Group listed in the byline) and/or Subgroup (eg, Steering Committee) |
|-----------------------------------|--------------|-----------------------|------------------|-------------------------------------------------------------------|------------------------------------------|---------------------------------------------------------|--------------------------------------------------------------------------------------------|
| Cara                              | Girardi      |                       |                  | Carolinas Medical Center, Atrium Health Musculoskeletal Institute | Charlotte, NC                            | Research Assistant                                      | PREPARE                                                                                    |
| Ada                               | Mayfield     |                       |                  | Carolinas Medical Center, Atrium Health Musculoskeletal Institute | Charlotte, NC                            | Research Assistant                                      | PREPARE                                                                                    |
| Juliette                          | Sweeney      |                       |                  | Carolinas Medical Center, Atrium Health Musculoskeletal Institute | Charlotte, NC                            | Research Assistant                                      | PREPARE                                                                                    |
| Hannah                            | Pollock      |                       |                  | Carolinas Medical Center, Atrium Health Musculoskeletal Institute | Charlotte, NC                            | Research Assistant                                      | PREPARE                                                                                    |
| Robert A.                         | Hymes        |                       |                  | Inova Fairfax Medical Campus                                      | Falls Church, VA                         | Local Principal Investigator                            | PREPARE                                                                                    |
| Cary C.                           | Schwartzbach |                       |                  | Inova Fairfax Medical Campus                                      | Falls Church, VA                         | Co-Investigator                                         | PREPARE                                                                                    |
| Jeff E.                           | Schulman     |                       |                  | Inova Fairfax Medical Campus                                      | Falls Church, VA                         | Co-Investigator                                         | PREPARE                                                                                    |
| A. Stephen                        | Malekzadeh   |                       |                  | Inova Fairfax Medical Campus                                      | Falls Church, VA                         | Co-Investigator                                         | PREPARE                                                                                    |
| Michael A.                        | Holzman      |                       |                  | Inova Fairfax Medical Campus                                      | Falls Church, VA                         | Co-Investigator                                         | PREPARE                                                                                    |
| Greg E.                           | Gaski        |                       |                  | Inova Fairfax Medical Campus                                      | Falls Church, VA                         | Co-Investigator                                         | PREPARE                                                                                    |
| Jonathan                          | Wills        |                       |                  | Inova Fairfax Medical Campus                                      | Falls Church, VA                         | Co-Investigator                                         | PREPARE                                                                                    |
| Lolita                            | Ramsey       |                       |                  | Inova Fairfax Medical Campus                                      | Falls Church, VA                         | Manager                                                 | PREPARE                                                                                    |
| James S.                          | Ahn          |                       |                  | Inova Fairfax Medical Campus                                      | Falls Church, VA                         | Research Coordinator                                    | PREPARE                                                                                    |
| Farhanaz                          | Panjshiri    |                       |                  | Inova Fairfax Medical Campus                                      | Falls Church, VA                         | Research Coordinator                                    | PREPARE                                                                                    |
| Sharmistha                        | Das          |                       |                  | Inova Fairfax Medical Campus                                      | Falls Church, VA                         | Research Coordinator                                    | PREPARE                                                                                    |
| Antoinisha D.                     | English      |                       |                  | Inova Fairfax Medical Campus                                      | Falls Church, VA                         | Research Coordinator                                    | PREPARE                                                                                    |
| Sharon M.                         | Haaser       |                       |                  | Inova Fairfax Medical Campus                                      | Falls Church, VA                         | Research Assistant                                      | PREPARE                                                                                    |
| Jaslynn A. N.                     | Cuff         |                       |                  | Inova Fairfax Medical Campus                                      | Falls Church, VA                         | Research Assistant                                      | PREPARE                                                                                    |
| Holly                             | Pilson       |                       |                  | Wake Forest Baptist Health                                        | Winston-Salem, NC                        | Local Principal Investigator                            | PREPARE                                                                                    |
| Eben A.                           | Carroll      |                       |                  | Wake Forest Baptist Health                                        | Winston-Salem, NC                        | Co-Investigator                                         | PREPARE                                                                                    |
| Jason J.                          | Halvorson    |                       |                  | Wake Forest Baptist Health                                        | Winston-Salem, NC                        | Co-Investigator                                         | PREPARE                                                                                    |
| Sharon                            | Babcock      |                       |                  | Wake Forest Baptist Health                                        | Winston-Salem, NC                        | Co-Investigator                                         | PREPARE                                                                                    |

## Supplemental Online Content: Nonauthor Collaborators

\*Indicates required information. Only first name, last name, and suffix will appear in PubMed.

| *First Name and Middle Initial(s) | *Last Name | *Suffix (eg, Jr, III) | Academic Degrees | Institution                        | Location (city, state/province, country) | Role or Contribution, eg, chair, principal investigator | Group (if more than 1 Group listed in the byline) and/or Subgroup (eg, Steering Committee) |
|-----------------------------------|------------|-----------------------|------------------|------------------------------------|------------------------------------------|---------------------------------------------------------|--------------------------------------------------------------------------------------------|
| J. Brett                          | Goodman    |                       |                  | Wake Forest Baptist Health         | Winston-Salem, NC                        | Research Coordinator                                    | PREPARE                                                                                    |
| Martha B.                         | Holden     |                       |                  | Wake Forest Baptist Health         | Winston-Salem, NC                        | Research Assistant                                      | PREPARE                                                                                    |
| Debra                             | Bullard    |                       |                  | Wake Forest Baptist Health         | Winston-Salem, NC                        | Research Assistant                                      | PREPARE                                                                                    |
| Wendy                             | Williams   |                       |                  | Wake Forest Baptist Health         | Winston-Salem, NC                        | Research Assistant                                      | PREPARE                                                                                    |
| Taylor                            | Hill       |                       |                  | Wake Forest Baptist Health         | Winston-Salem, NC                        | Research Assistant                                      | PREPARE                                                                                    |
| Ariel                             | Brotherton |                       |                  | Wake Forest Baptist Health         | Winston-Salem, NC                        | Research Assistant                                      | PREPARE                                                                                    |
| Thomas F.                         | Higgins    |                       |                  | University of Utah                 | Salt Lake City, Utah                     | Local Principal Investigator                            | PREPARE                                                                                    |
| Justin M.                         | Haller     |                       |                  | University of Utah                 | Salt Lake City, Utah                     | Co-Investigator                                         | PREPARE                                                                                    |
| David L.                          | Rothberg   |                       |                  | University of Utah                 | Salt Lake City, Utah                     | Co-Investigator                                         | PREPARE                                                                                    |
| Lucas S.                          | Marchand   |                       |                  | University of Utah                 | Salt Lake City, Utah                     | Co-Investigator                                         | PREPARE                                                                                    |
| Ashley                            | Neese      |                       |                  | University of Utah                 | Salt Lake City, Utah                     | Manager                                                 | PREPARE                                                                                    |
| Mark                              | Russell    |                       |                  | University of Utah                 | Salt Lake City, Utah                     | Research Coordinator                                    | PREPARE                                                                                    |
| Zachary M                         | Olsen      |                       |                  | University of Utah                 | Salt Lake City, Utah                     | Research Coordinator                                    | PREPARE                                                                                    |
| Abby V.                           | McGowan    |                       |                  | University of Utah                 | Salt Lake City, Utah                     | Research Coordinator                                    | PREPARE                                                                                    |
| Sophia                            | Hill       |                       |                  | University of Utah                 | Salt Lake City, Utah                     | Research Coordinator                                    | PREPARE                                                                                    |
| I. Leah                           | Gitajn     |                       |                  | Dartmouth-Hitchcock Medical Center | Lebanon, NH                              | Local Principal Investigator                            | PREPARE                                                                                    |
| Marcus                            | Coe        |                       |                  | Dartmouth-Hitchcock Medical Center | Lebanon, NH                              | Co-Investigator                                         | PREPARE                                                                                    |
| Kevin                             | Dwyer      |                       |                  | Dartmouth-Hitchcock Medical Center | Lebanon, NH                              | Co-Investigator                                         | PREPARE                                                                                    |
| Devin                             | Mullin     |                       |                  | Dartmouth-Hitchcock Medical Center | Lebanon, NH                              | Research Coordinator                                    | PREPARE                                                                                    |
| Clifford A.                       | Reilly     |                       |                  | Dartmouth-Hitchcock Medical Center | Lebanon, NH                              | Research Assistant                                      | PREPARE                                                                                    |
| Peter                             | DePalo     |                       |                  | Dartmouth-Hitchcock Medical Center | Lebanon, NH                              | Research Assistant                                      | PREPARE                                                                                    |
| Amy E.                            | Hall       |                       |                  | Dartmouth-Hitchcock Medical Center | Lebanon, NH                              | Research Assistant                                      | PREPARE                                                                                    |
| Rebecca E.                        | Dabrowski  |                       |                  | Dartmouth-Hitchcock Medical Center | Lebanon, NH                              | Research Assistant                                      | PREPARE                                                                                    |



## Supplemental Online Content: Nonauthor Collaborators

\*Indicates required information. Only first name, last name, and suffix will appear in PubMed.

| *First Name and Middle Initial(s) | *Last Name    | *Suffix (eg, Jr, III) | Academic Degrees | Institution                              | Location (city, state/province, country) | Role or Contribution, eg, chair, principal investigator | Group (if more than 1 Group listed in the byline) and/or Subgroup (eg, Steering Committee) |
|-----------------------------------|---------------|-----------------------|------------------|------------------------------------------|------------------------------------------|---------------------------------------------------------|--------------------------------------------------------------------------------------------|
| Theresa A.                        | Chockbengboun |                       |                  | Dartmouth-Hitchcock Medical Center       | Lebanon, NH                              | Research Assistant                                      | PREPARE                                                                                    |
| Marilyn                           | Heng          |                       |                  | Massachusetts General Hospital           | Boston, MA                               | Local Principal Investigator                            | PREPARE                                                                                    |
| Mitchel B.                        | Harris        |                       |                  | Massachusetts General Hospital           | Boston, MA                               | Co-Investigator                                         | PREPARE                                                                                    |
| R. Malcolm                        | Smith         |                       |                  | Massachusetts General Hospital           | Boston, MA                               | Co-Investigator                                         | PREPARE                                                                                    |
| David W.                          | Lhowe         |                       |                  | Massachusetts General Hospital           | Boston, MA                               | Co-Investigator                                         | PREPARE                                                                                    |
| John G.                           | Esposito      |                       |                  | Massachusetts General Hospital           | Boston, MA                               | Co-Investigator                                         | PREPARE                                                                                    |
| Mira                              | Bansal        |                       |                  | Massachusetts General Hospital           | Boston, MA                               | Research Assistant                                      | PREPARE                                                                                    |
| Michael                           | McTague       |                       |                  | Massachusetts General Hospital           | Boston, MA                               | Research Director                                       | PREPARE                                                                                    |
| Ahmad                             | Alnasser      |                       |                  | Massachusetts General Hospital           | Boston, MA                               | Research Assistant                                      | PREPARE                                                                                    |
| Patrick F.                        | Bergin        |                       |                  | University of Mississippi Medical Center | Jackson, MS                              | Local Principal Investigator                            | PREPARE                                                                                    |
| George V.                         | Russell       |                       |                  | University of Mississippi Medical Center | Jackson, MS                              | Co-Investigator                                         | PREPARE                                                                                    |
| Matthew L.                        | Graves        |                       |                  | University of Mississippi Medical Center | Jackson, MS                              | Co-Investigator                                         | PREPARE                                                                                    |
| John                              | Morellato     |                       |                  | University of Mississippi Medical Center | Jackson, MS                              | Co-Investigator                                         | PREPARE                                                                                    |
| Heather K.                        | Champion      |                       |                  | University of Mississippi Medical Center | Jackson, MS                              | Research Assistant                                      | PREPARE                                                                                    |
| Leslie N.                         | Johnson       |                       |                  | University of Mississippi Medical Center | Jackson, MS                              | Research Coordinator                                    | PREPARE                                                                                    |
| Sheketha L.                       | McGee         |                       |                  | University of Mississippi Medical Center | Jackson, MS                              | Manager                                                 | PREPARE                                                                                    |
| Eldrin L.                         | Bhanat        |                       |                  | University of Mississippi Medical Center | Jackson, MS                              | Research Coordinator                                    | PREPARE                                                                                    |
| Josny                             | Thimothee     |                       |                  | University of Mississippi Medical Center | Jackson, MS                              | Research Coordinator                                    | PREPARE                                                                                    |
| Jackie                            | Serrano       |                       |                  | University of Mississippi Medical Center | Jackson, MS                              | Research Coordinator                                    | PREPARE                                                                                    |

## Supplemental Online Content: Nonauthor Collaborators

\*Indicates required information. Only first name, last name, and suffix will appear in PubMed.

| *First Name and Middle Initial(s) | *Last Name   | *Suffix (eg, Jr, III) | Academic Degrees | Institution                                                  | Location (city, state/province, country) | Role or Contribution, eg, chair, principal investigator | Group (if more than 1 Group listed in the byline) and/or Subgroup (eg, Steering Committee) |
|-----------------------------------|--------------|-----------------------|------------------|--------------------------------------------------------------|------------------------------------------|---------------------------------------------------------|--------------------------------------------------------------------------------------------|
| Samir                             | Mehta        |                       |                  | University of Pennsylvania                                   | Philadelphia, PA                         | Local Principal Investigator                            | PREPARE                                                                                    |
| Derek                             | Donehan      |                       |                  | University of Pennsylvania                                   | Philadelphia, PA                         | Co-Investigator                                         | PREPARE                                                                                    |
| Jaimo                             | Ahn          |                       |                  | University of Pennsylvania                                   | Philadelphia, PA                         | Co-Investigator                                         | PREPARE                                                                                    |
| Annamarie                         | Horan        |                       |                  | University of Pennsylvania                                   | Philadelphia, PA                         | Manager                                                 | PREPARE                                                                                    |
| Mary                              | Dooley       |                       |                  | University of Pennsylvania                                   | Philadelphia, PA                         | Research Assistant                                      | PREPARE                                                                                    |
| Ashley                            | Kuczinski    |                       |                  | University of Pennsylvania                                   | Philadelphia, PA                         | Research Coordinator                                    | PREPARE                                                                                    |
| Ashley                            | Iwu          |                       |                  | University of Pennsylvania                                   | Philadelphia, PA                         | Research Coordinator                                    | PREPARE                                                                                    |
| David                             | Potter       |                       |                  | Sanford Health                                               | Sioux Falls, SD                          | Local Principal Investigator                            | PREPARE                                                                                    |
| Robert                            | VanDemark    | III                   |                  | Sanford Health                                               | Sioux Falls, SD                          | Co-Investigator                                         | PREPARE                                                                                    |
| Branden                           | Pfaff        |                       |                  | Sanford Health                                               | Sioux Falls, SD                          | Research Coordinator                                    | PREPARE                                                                                    |
| Troy                              | Hollinsworth |                       |                  | Sanford Health                                               | Sioux Falls, SD                          | Research Coordinator                                    | PREPARE                                                                                    |
| Kristi                            | Atkins       |                       |                  | Sanford Health                                               | Sioux Falls, SD                          | Research Coordinator                                    | PREPARE                                                                                    |
| Michael J.                        | Weaver       |                       |                  | Brigham Women's Hospital                                     | Boston, MA                               | Local Principal Investigator                            | PREPARE                                                                                    |
| Arvind G.                         | von Keudell  |                       |                  | Brigham Women's Hospital                                     | Boston, MA                               | Co-Investigator                                         | PREPARE                                                                                    |
| Elizabeth M.                      | Allen        |                       |                  | Brigham Women's Hospital                                     | Boston, MA                               | Research Assistant                                      | PREPARE                                                                                    |
| Abigail E.                        | Sagona       |                       |                  | Brigham Women's Hospital                                     | Boston, MA                               | Research Assistant                                      | PREPARE                                                                                    |
| Todd                              | Jaebлон      |                       |                  | University of Maryland Prince George's Capital Region Health | Cheverly, MD                             | Local Principal Investigator                            | PREPARE                                                                                    |
| Robert                            | Beer         |                       |                  | University of Maryland Prince George's Capital Region Health | Cheverly, MD                             | Co-Investigator                                         | PREPARE                                                                                    |
| Haley K.                          | Demyanovich  |                       |                  | University of Maryland Prince George's Capital Region Health | Cheverly, MD                             | Research Coordinator                                    | PREPARE                                                                                    |
| Brent                             | Bauer        |                       |                  | University of Maryland Prince George's Capital Region Health | Cheverly, MD                             | Research Coordinator                                    | PREPARE                                                                                    |
| Sean                              | Meredith     |                       |                  | University of Maryland Prince George's Capital Region Health | Cheverly, MD                             | Research Coordinator                                    | PREPARE                                                                                    |
| Autumn                            | Stone        |                       |                  | University of Maryland Prince George's Capital Region Health | Cheverly, MD                             | Research Coordinator                                    | PREPARE                                                                                    |

Supplemental Online Content: Nonauthor Collaborators

\*Indicates required information. Only first name, last name, and suffix will appear in PubMed.

| <b>*First Name and Middle Initial(s)</b> | <b>*Last Name</b> | <b>*Suffix (eg, Jr, III)</b> | Academic Degrees | Institution              | Location (city, state/province, country) | Role or Contribution, eg, chair, principal investigator | Group (if more than 1 Group listed in the byline) and/or Subgroup (eg, Steering Committee) |
|------------------------------------------|-------------------|------------------------------|------------------|--------------------------|------------------------------------------|---------------------------------------------------------|--------------------------------------------------------------------------------------------|
| Mark J.                                  | Gage              |                              |                  | Duke University Hospital | Durham, NC                               | Local Principal Investigator                            | PREPARE                                                                                    |
| Rachel M.                                | Reilly            |                              |                  | Duke University Hospital | Durham, NC                               | Co-Investigator                                         | PREPARE                                                                                    |
| Cindy                                    | Sparrow           |                              |                  | Duke University Hospital | Durham, NC                               | Research Coordinator                                    | PREPARE                                                                                    |
| Ariana                                   | Paniagua          |                              |                  | Duke University Hospital | Durham, NC                               | Research Coordinator                                    | PREPARE                                                                                    |
